# Supplementary material for: Unexpected regiospecific Michael addition product: synthesis of 5,6-dihydrobenzo[1,7]phenanthrolines
Source: Royal Society of Chemistry journal article supplement (doi:10.1039/c4ra16640j), 2015-01-01

## Supporting information

### Unexpected regiospecific Michael addition Product: 5,6-dihydrobenzo[1,7]phenanthroline synthesis

Selvaraj Mohana Roopan<sup>a,\*</sup>, Annadurai Bharathi<sup>a</sup>, Jeyakannu Palaniraja<sup>a</sup>, K. Anand<sup>b</sup>, and R. M. Gengan<sup>b</sup>

<sup>a</sup>*Chemistry of Heterocycles & Natural Product Research Laboratory, Organic Chemistry Division, School of Advanced Sciences; VIT University, Vellore 632 014, Tamil Nadu, India.*

<sup>b</sup>*Department of Chemistry, Faculty of Applied Sciences, Durban University of Technology, Durban, South Africa*

\*Email: [mohanarooopan.s@vit.ac.in](mailto:mohanarooopan.s@vit.ac.in); [mohanarooopan.s@gmail.com](mailto:mohanarooopan.s@gmail.com)

**Table S1.** Crystallographic data of 10-chloro-4-(4-chlorophenyl)-2-ethoxy-12-phenyl-5,6-dihydrobenzo[*j*][1,7]phenanthroline (**5**):

|                                   |                                                                                                       |
|-----------------------------------|-------------------------------------------------------------------------------------------------------|
| Empirical formula                 | C <sub>30</sub> H <sub>22</sub> Cl <sub>2</sub> N <sub>2</sub> O                                      |
| Formula weight                    | 497.40                                                                                                |
| Temperature                       | 293(2) K                                                                                              |
| Wavelength                        | 0.71073 Å                                                                                             |
| Crystal system, space group       | Monoclinic, P21/c                                                                                     |
| Unit cell dimensions              | a = 11.3697(2) Å    α = 90 °<br>b = 28.8078(5) Å    β = 98.4130(10) °<br>c = 15.2132(3) Å    γ = 90 ° |
| Volume                            | 4929.25(16) Å <sup>3</sup>                                                                            |
| Z, Calculated density             | 8, 1.340 Mg/m <sup>3</sup>                                                                            |
| Absorption coefficient            | 0.290 mm <sup>-1</sup>                                                                                |
| F(000)                            | 2064                                                                                                  |
| Crystal size                      | 0.35 x 0.30 x 0.30 mm                                                                                 |
| Theta range for data collection   | 2.21- 25.00 °                                                                                         |
| Limiting indices                  | -13<=h<=13, -25<=k<=34, -18<=l<=18                                                                    |
| Reflections collected / unique    | 45391 / 8675 [R(int) = 0.0351]                                                                        |
| Completeness to theta = 25.00 °   | 99.9 %                                                                                                |
| Absorption correction             | Semi-empirical from equivalents                                                                       |
| Max. and min. transmission        | 0.9568 and 0.9021                                                                                     |
| Refinement method                 | Full-matrix least-squares on F <sup>2</sup>                                                           |
| Data / restraints / parameters    | 8675 / 0 / 632                                                                                        |
| Goodness-of-fit on F <sup>2</sup> | 1.021                                                                                                 |
| Final R indices [I > 2σ(I)]       | R <sub>1</sub> = 0.0379, wR <sub>2</sub> = 0.0888                                                     |
| R indices (all data)              | R <sub>1</sub> = 0.0599, wR <sub>2</sub> = 0.1025                                                     |
| Extinction coefficient            | 0.0024(2)                                                                                             |
| Largest diff. peak and hole       | 0.257 and -0.333 e.Å <sup>-3</sup>                                                                    |

**Fig 1.**  $^1\text{H}$  NMR spectrum of 10-chloro-4-(3,4-dimethoxyphenyl)-2-ethoxy-12-phenyl-5,6-dihydrobenzo[*j*][1,7]phenanthroline-3-carbonitrile (**4a**)

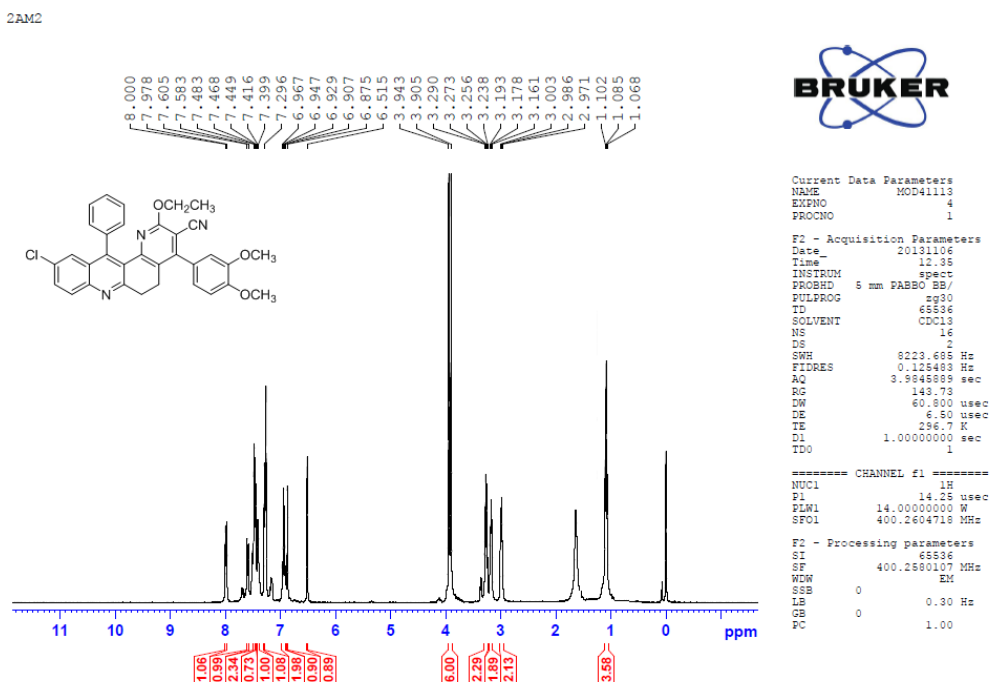

**Fig 2.**  $^{13}\text{C}$  NMR spectrum of 10-chloro-4-(3,4-dimethoxyphenyl)-2-ethoxy-12-phenyl-5,6-dihydrobenzo[*j*][1,7]phenanthroline-3-carbonitrile (**4a**)

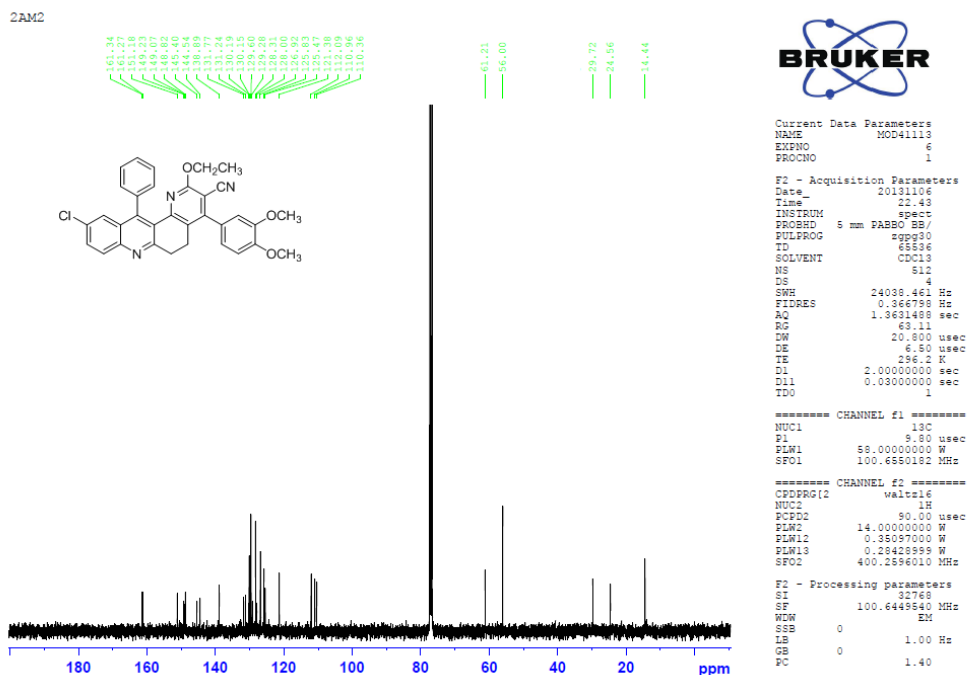

**Fig 3.** ESI-MS spectrum of 10-chloro-4-(3,4-dimethoxyphenyl)-2-ethoxy-12-phenyl-5,6-dihydrobenzo[*j*][1,7]phenanthroline-3-carbonitrile (**4a**)

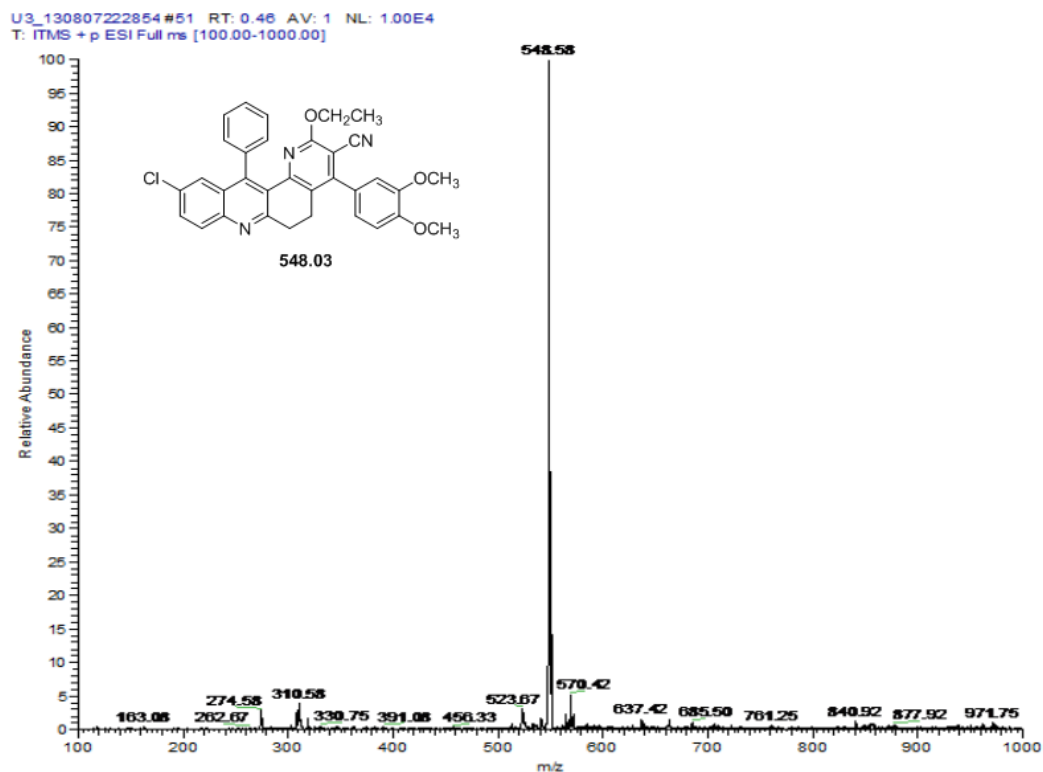

**Fig 4.** <sup>1</sup>H NMR spectrum of 10-chloro-4-(4-chlorophenyl)-2-ethoxy-12-phenyl-5,6-dihydrobenzo[*j*][1,7]phenanthroline-3-carbonitrile (**4b**)

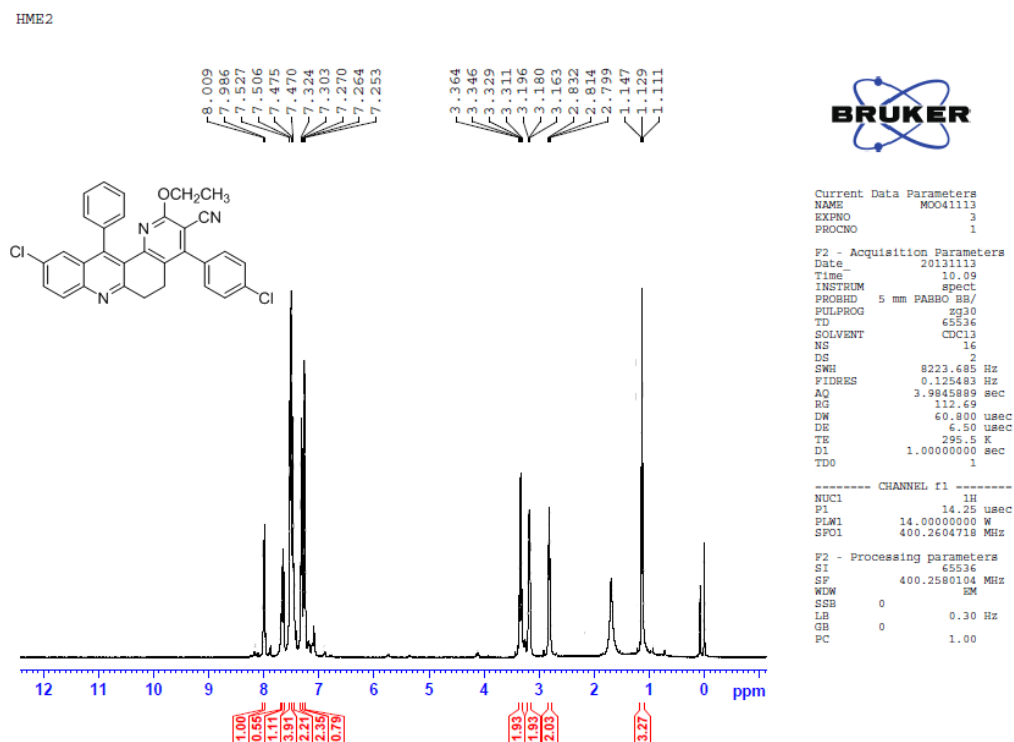

**Fig 5.**  $^{13}\text{C}$  NMR spectrum of 10-chloro-4-(4-chlorophenyl)-2-ethoxy-12-phenyl-5,6-dihydrobenzo[*j*][1,7]phenanthroline-3-carbonitrile (**4b**)

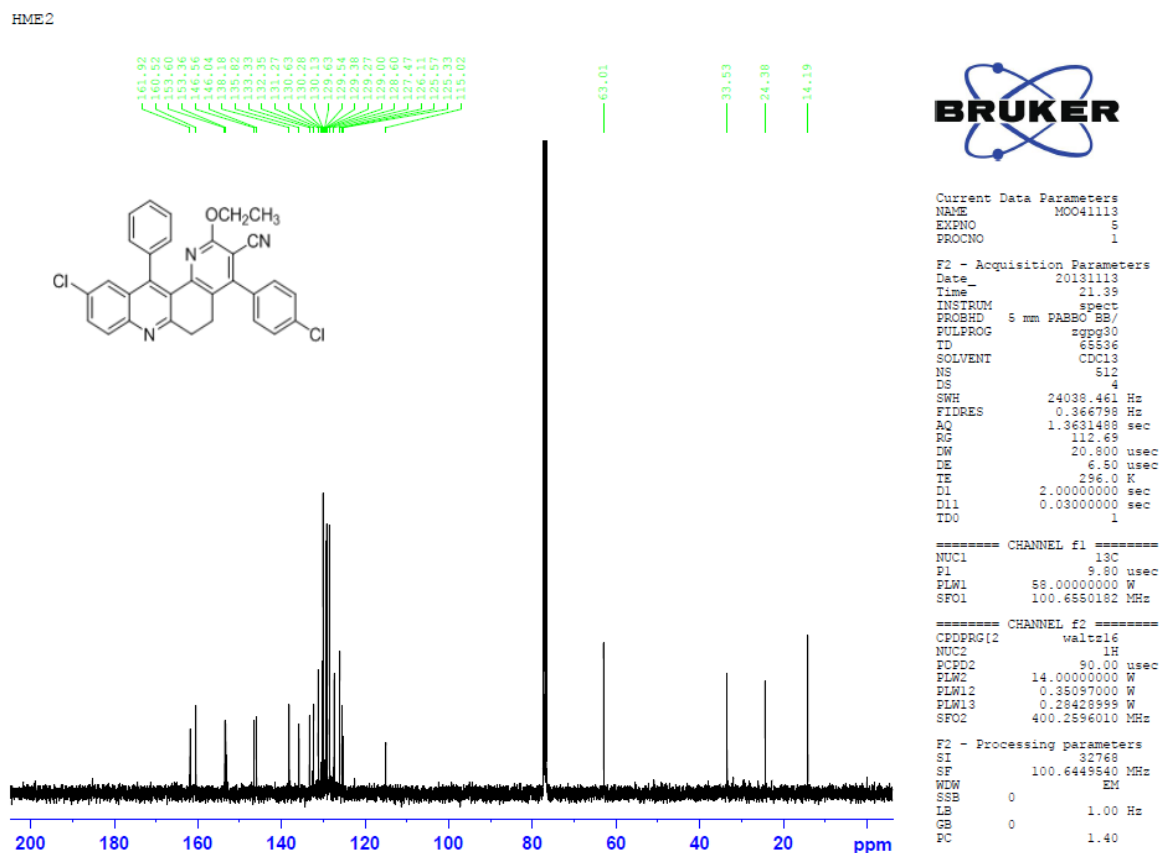

**Fig 6.** ESI-MS spectrum of 10-chloro-4-(4-chlorophenyl)-2-ethoxy-12-phenyl-5,6-dihydrobenzo[*j*][1,7]phenanthroline-3-carbonitrile (**4b**)

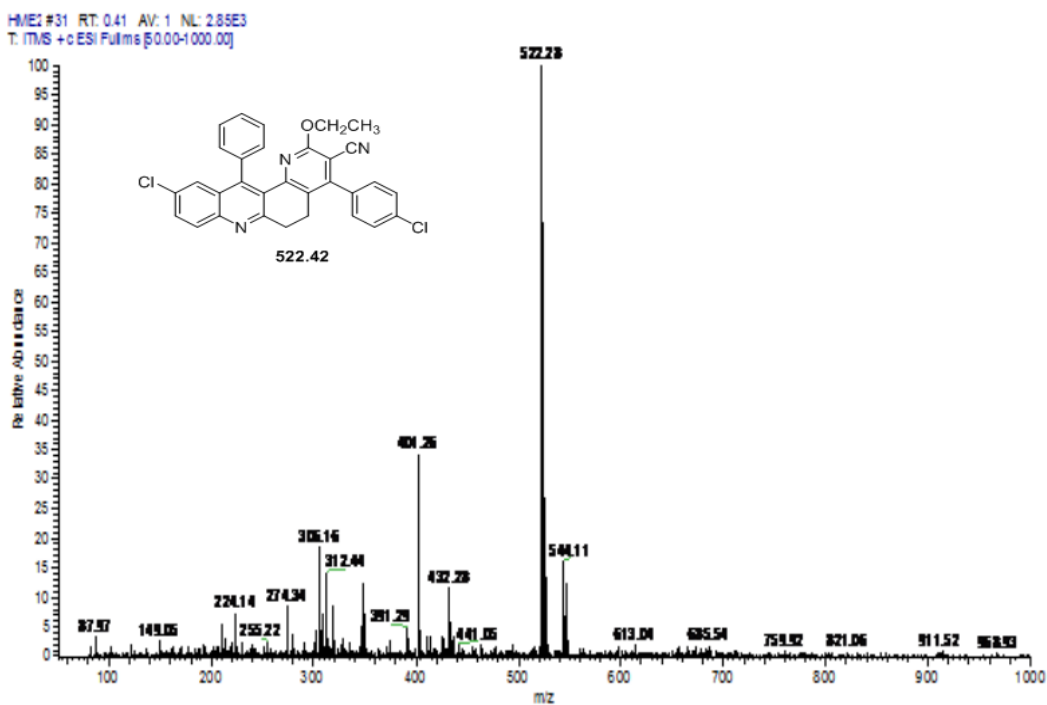

**Fig 7.**  $^1\text{H}$  NMR spectrum of 4-(4-Chloro-phenyl)-2-ethoxy-12-phenyl-5,6-dihydrobenzo[*j*][1,7]phenanthroline-3-carbonitrile (**4c**):

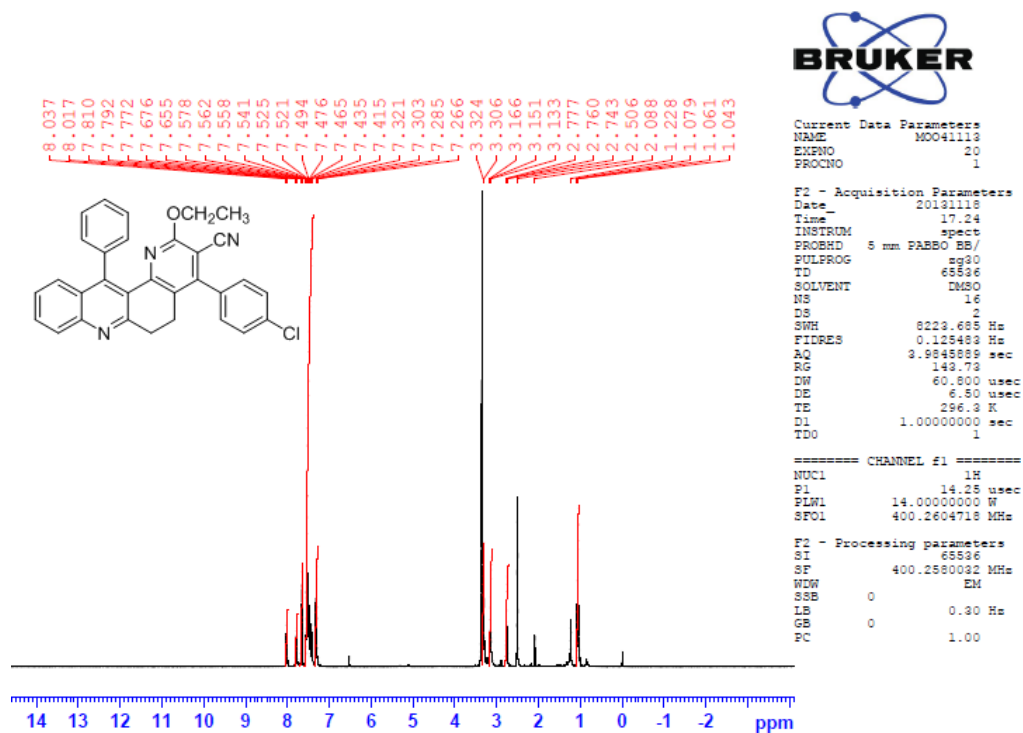

**Fig 8.**  $^{13}\text{C}$  NMR spectrum of 4-(4-Chloro-phenyl)-2-ethoxy-12-phenyl-5,6-dihydrobenzo[*j*][1,7] phenanthroline-3-carbonitrile (**4c**):

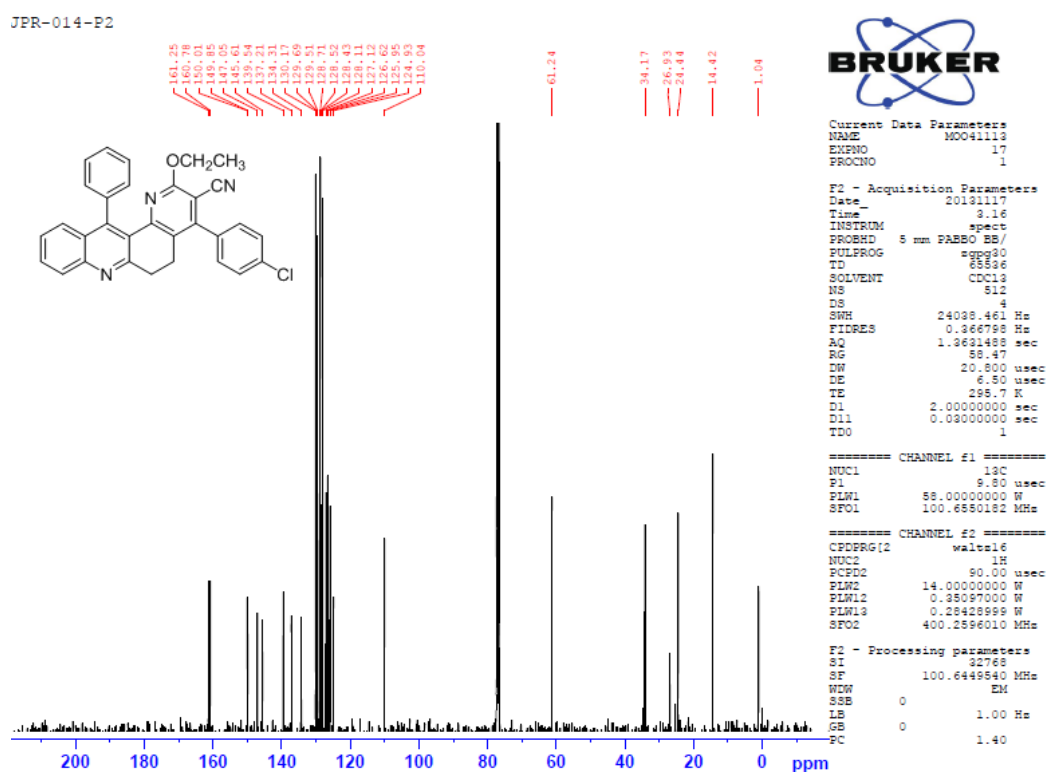

**Fig 9.** ESI-MS spectrum of 4-(4-Chloro-phenyl)-2-ethoxy-12-phenyl-5,6-dihydrobenzo[*j*][1,7] phenanthroline-3-carbonitrile (**4c**):

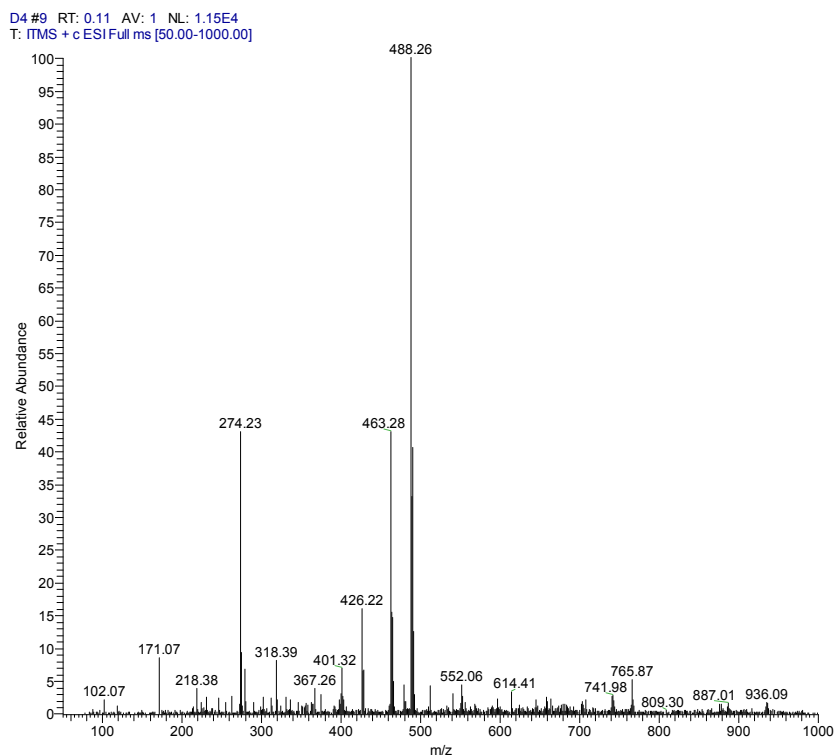

**Fig 10.** <sup>1</sup>H NMR spectrum of 4-(4-Chloro-phenyl)-2-ethoxy-12-methyl-5,6-dihydrobenzo[*j*][1,7] phenanthroline-3-carbonitrile (**4d**):

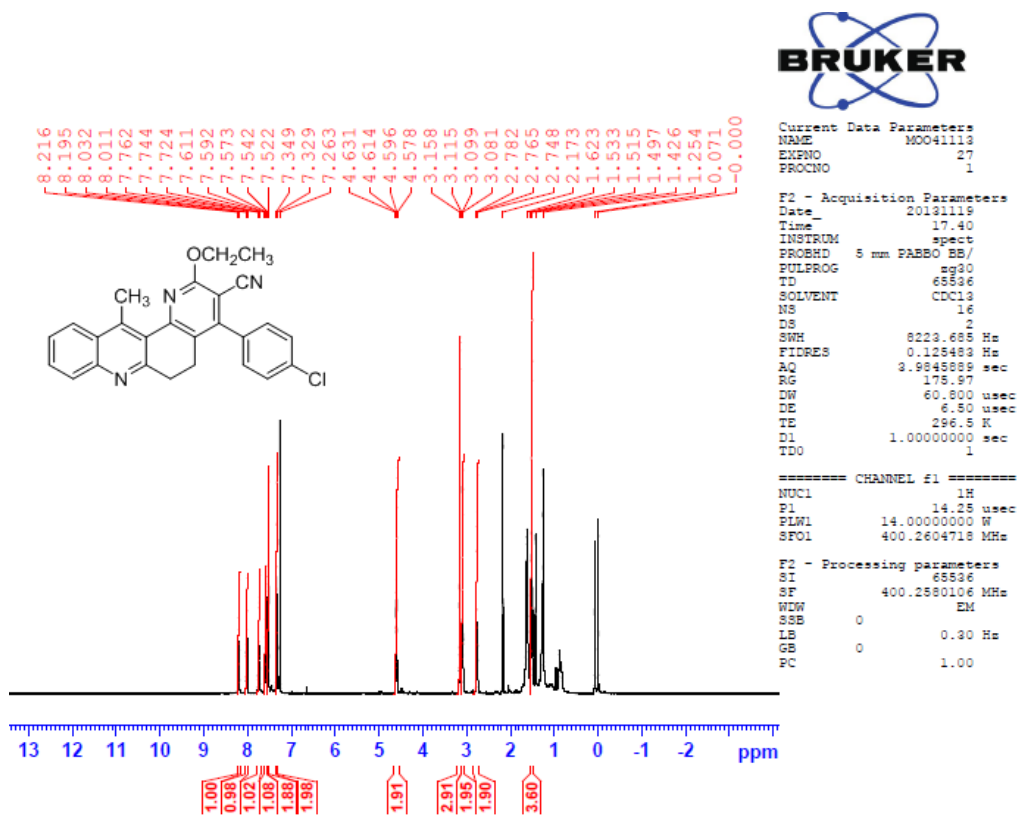

**Fig 11.**  $^{13}\text{C}$  NMR spectrum of 4-(4-Chloro-phenyl)-2-ethoxy-12-methyl-5,6-dihydrobenzo[*j*][1,7] phenanthroline-3-carbonitrile (**4d**):

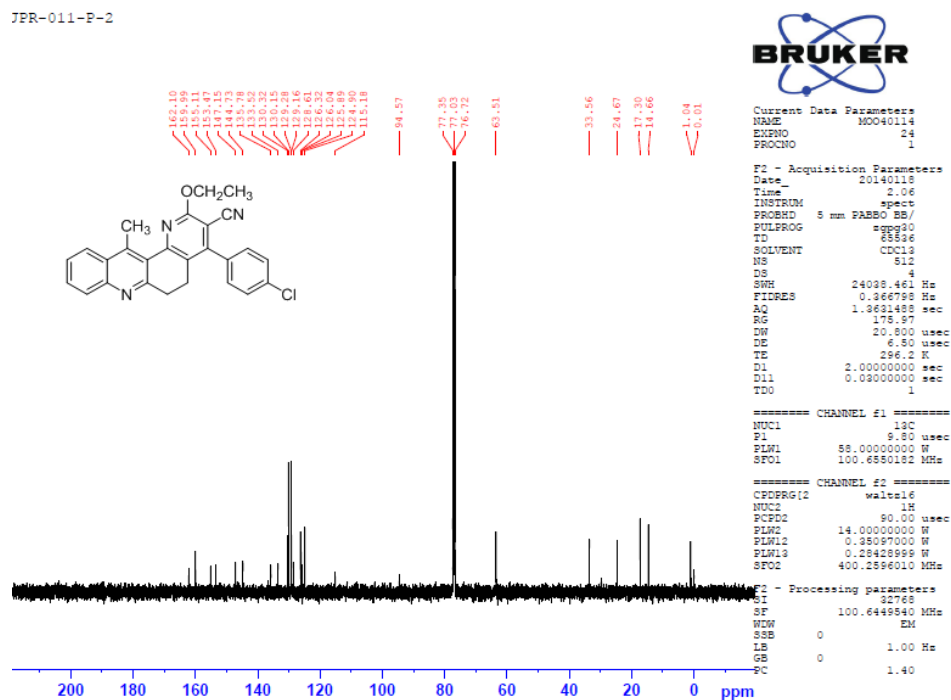

**Fig 12.** ESI-MS spectrum of 4-(4-Chloro-phenyl)-2-ethoxy-12-methyl-5,6-dihydrobenzo[*j*][1,7] phenanthroline-3-carbonitrile (**4d**):

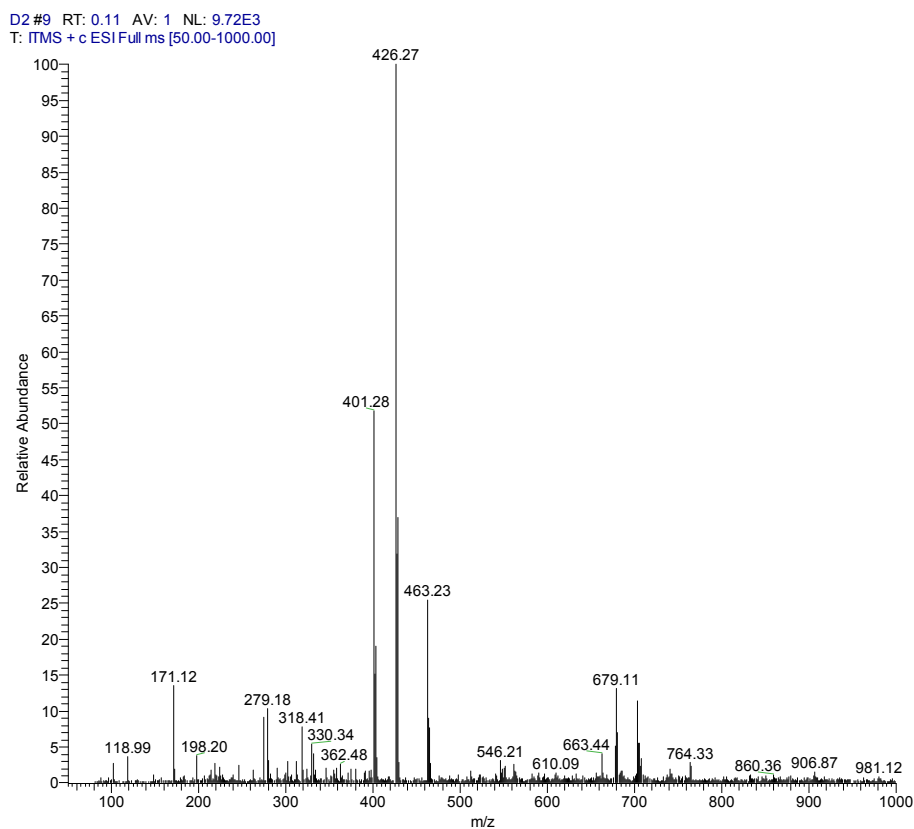

**Fig 13.**  $^1\text{H}$  NMR spectrum of 10-chloro-4-(3,4-dimethoxyphenyl)-2-ethoxy-12-phenyl-5,6-dihydrobenzo[*j*][1,7]phenanthroline (**5a**)

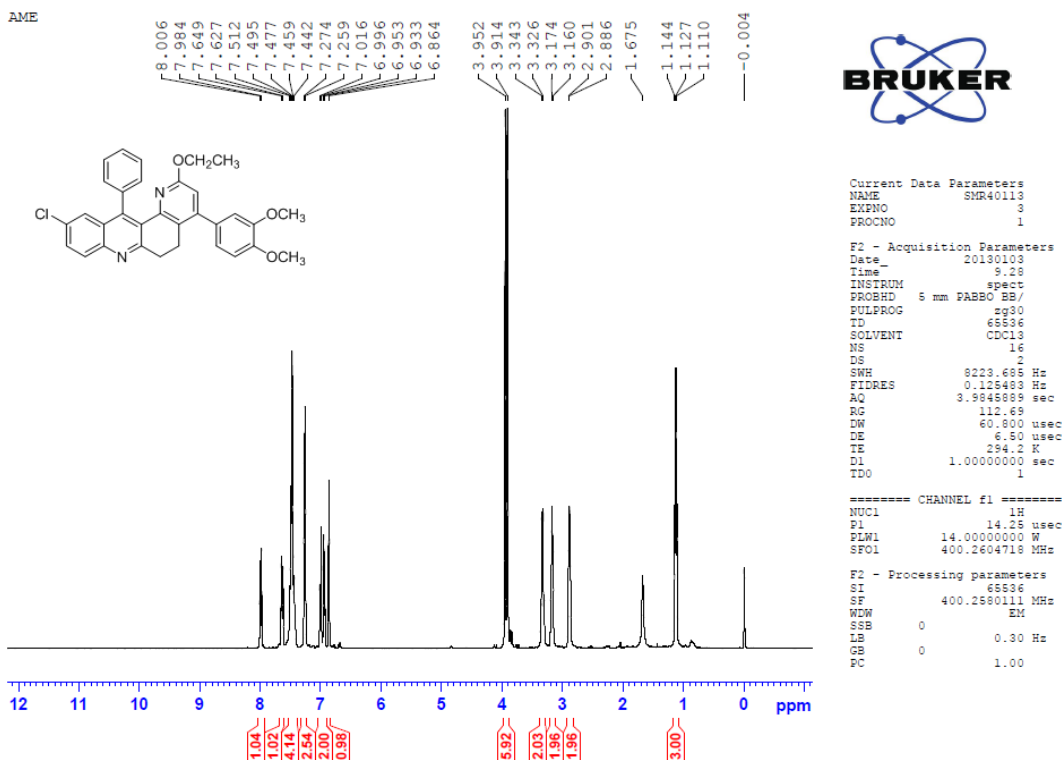

**Fig 14.**  $^{13}\text{C}$  NMR spectrum of 10-chloro-4-(3,4-dimethoxyphenyl)-2-ethoxy-12-phenyl-5,6-dihydrobenzo[*j*][1,7]phenanthroline (**5a**)

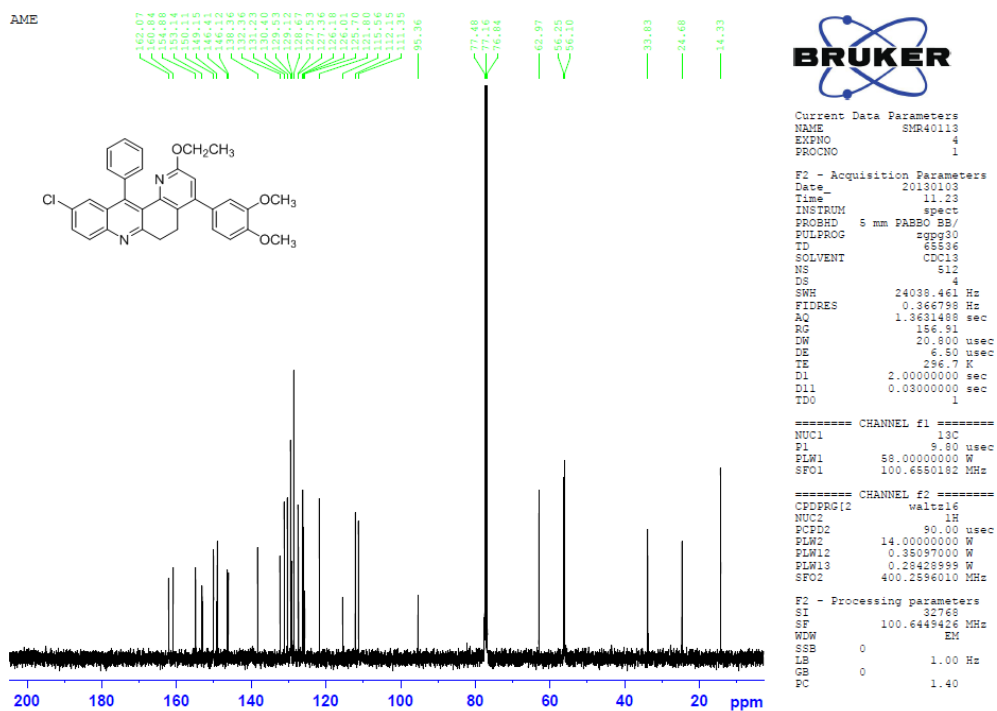



**Fig 15.** ESI-MS spectrum of 10-chloro-4-(3,4-dimethoxyphenyl)-2-ethoxy-12-phenyl-5,6-dihydrobenzo[*j*][1,7]phenanthroline (**5a**)

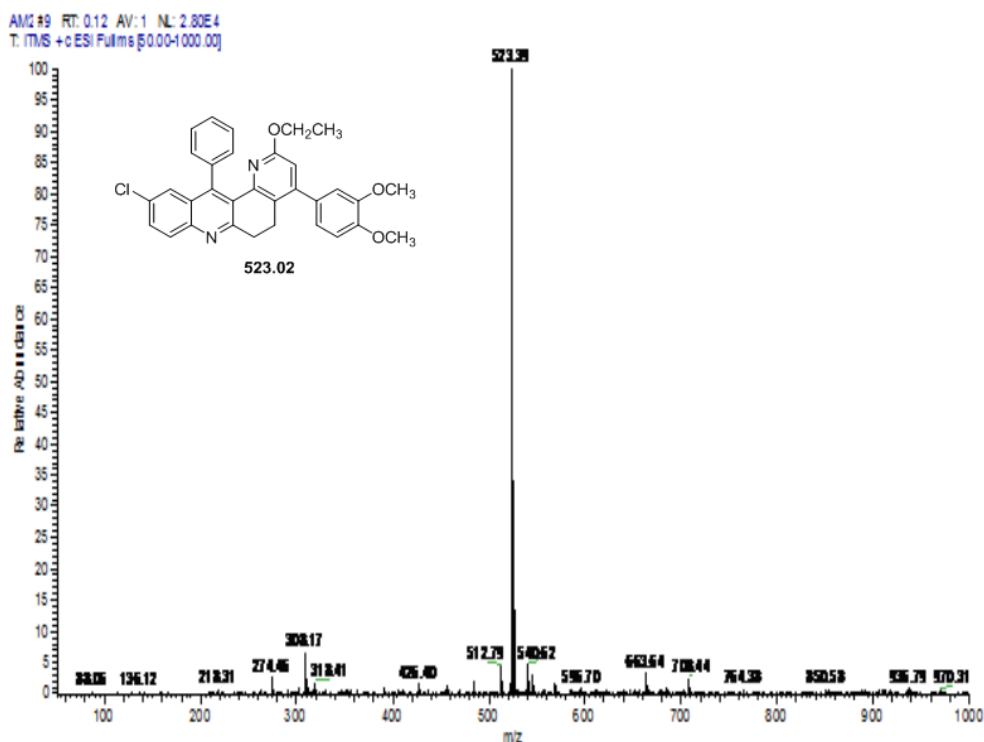

**Fig 16.** <sup>1</sup>H NMR spectrum of 10-chloro-4-(4-chlorophenyl)-2-ethoxy-12-phenyl-5,6-dihydrobenzo[*j*][1,7]phenanthroline (**5b**)

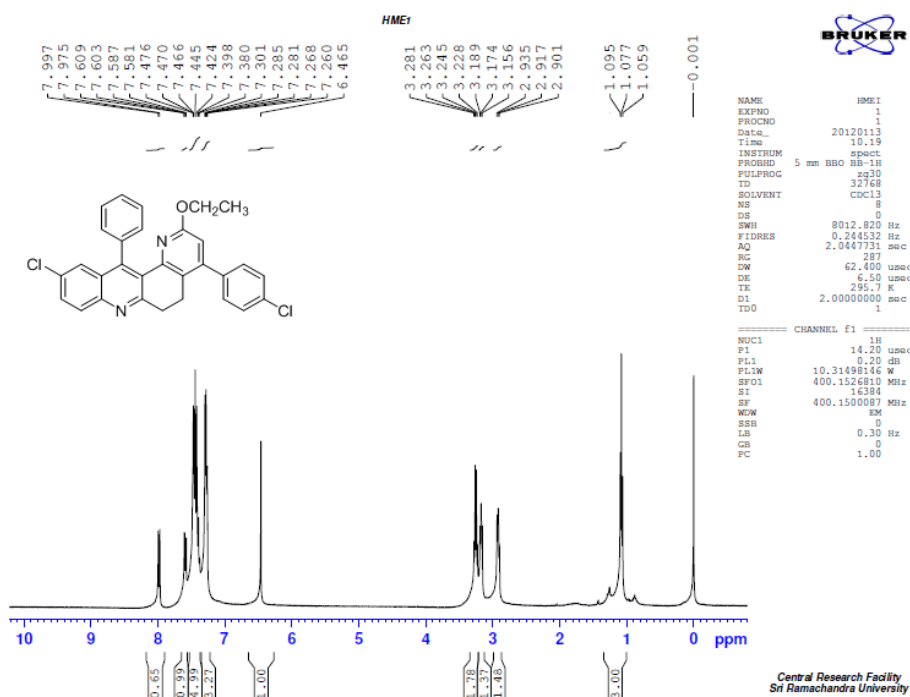

**Fig 17.**  $^1\text{H}$  NMR spectrum of 10-chloro-4-(4-chlorophenyl)-2-ethoxy-12-phenyl-5,6-dihydrobenzo[*j*][1,7]phenanthroline (**5b**)

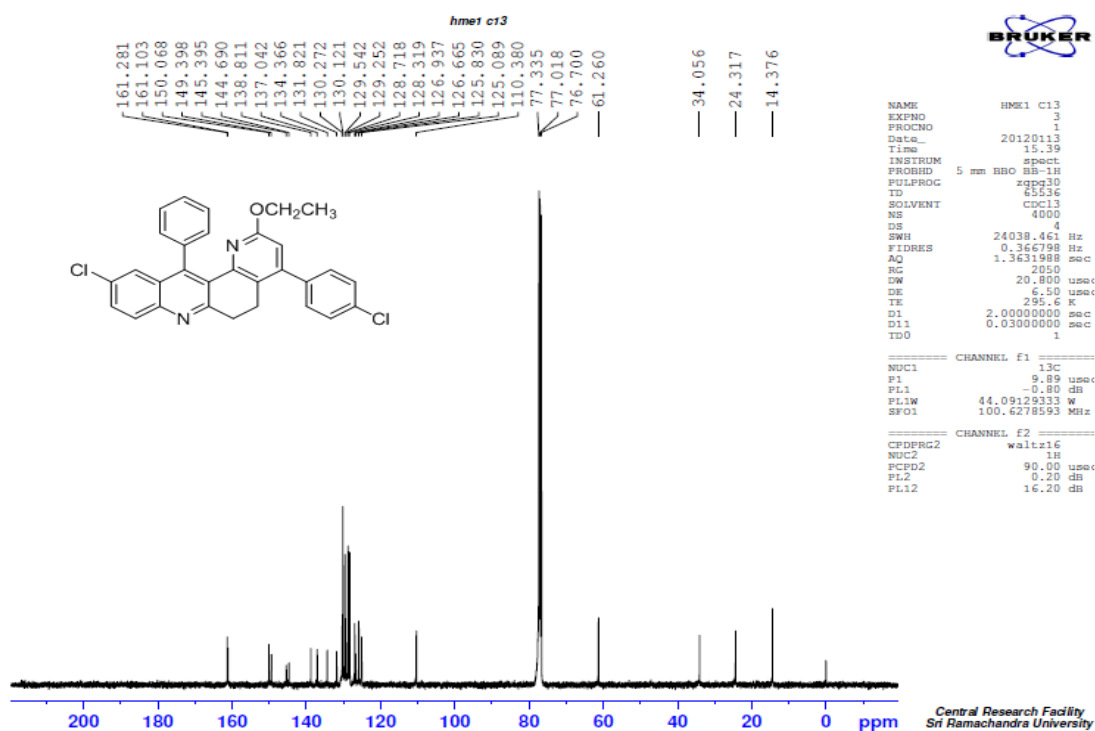

**Fig 18.** ESI-MS spectrum of 10-chloro-4-(4-chlorophenyl)-2-ethoxy-12-phenyl-5,6-dihydrobenzo[*j*][1,7]phenanthroline (**5b**)

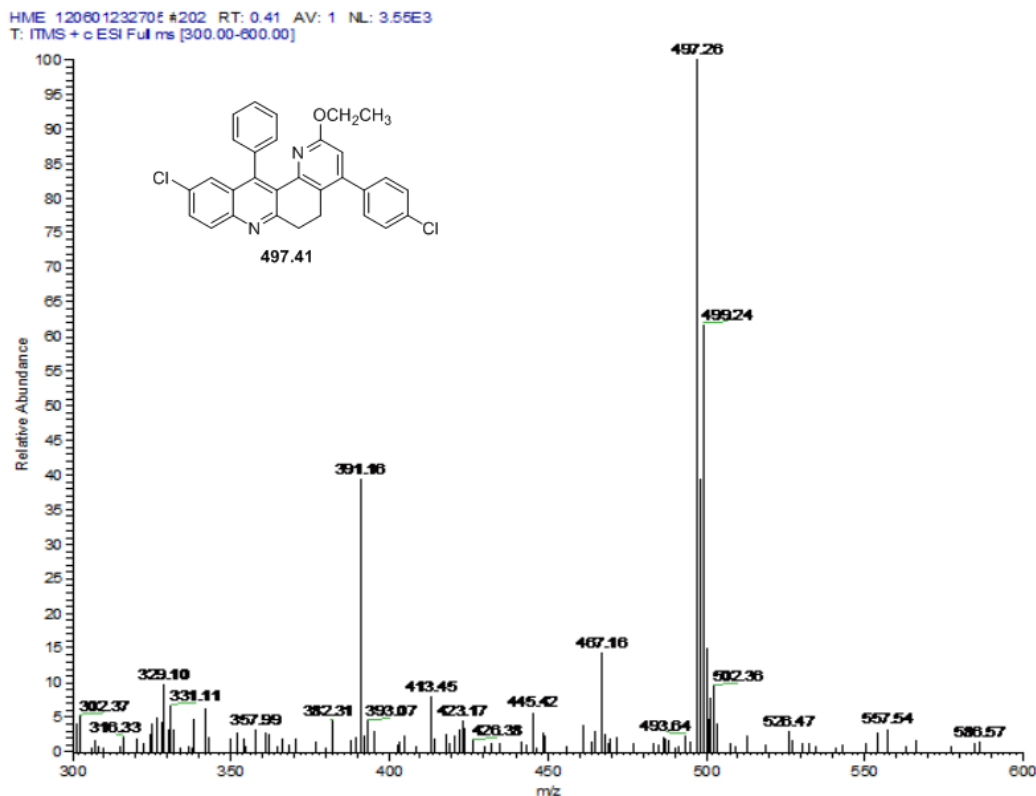

**Fig 19.**  $^1\text{H}$  NMR spectrum of 4-(4-Chloro-phenyl)-2-ethoxy-12-phenyl-5,6-dihydrobenzo[*j*][1,7]phenanthroline (**5c**):

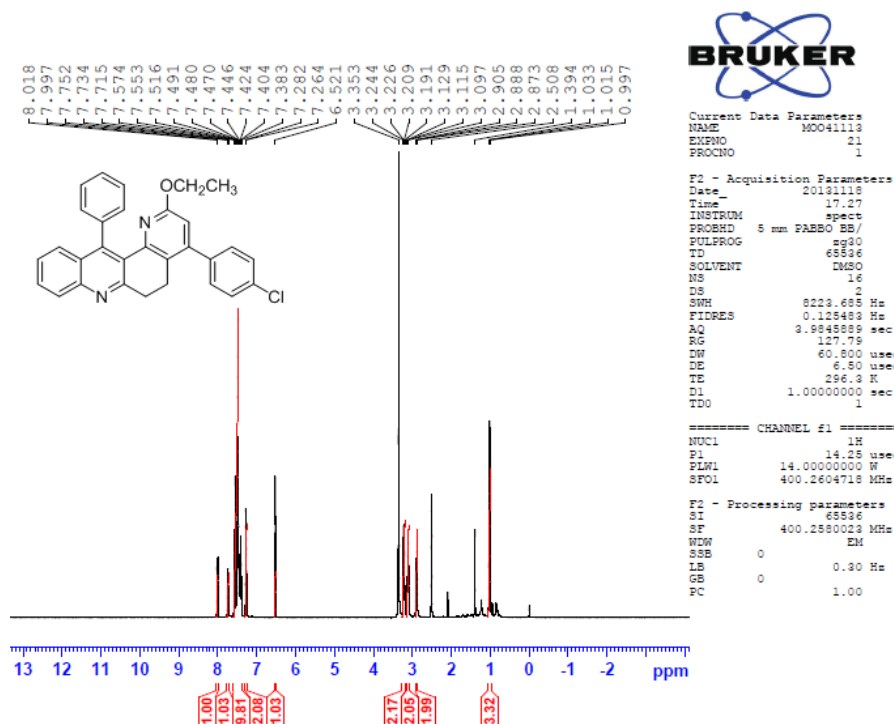

**Fig 20.**  $^{13}\text{C}$  NMR spectrum of 4-(4-Chloro-phenyl)-2-ethoxy-12-phenyl-5,6-dihydrobenzo[*j*][1,7]phenanthroline (**5c**):

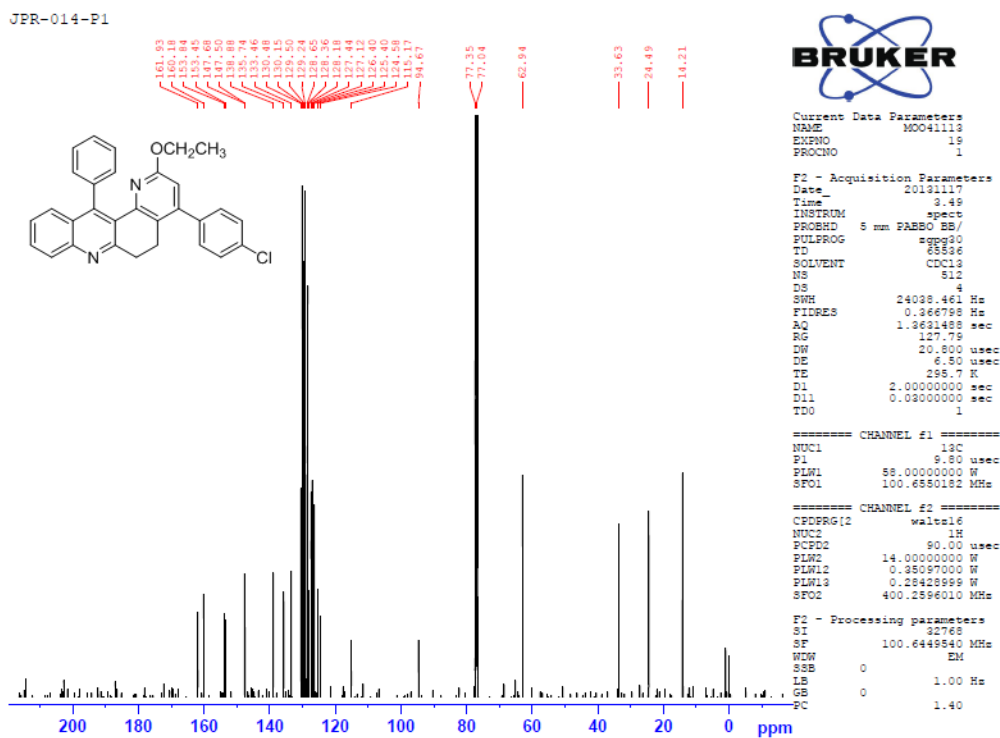

**Fig 21.** ESI-MS spectrum of 4-(4-Chloro-phenyl)-2-ethoxy-12-phenyl-5,6-dihydrobenzo[*j*][1,7]phenanthroline (**5c**):

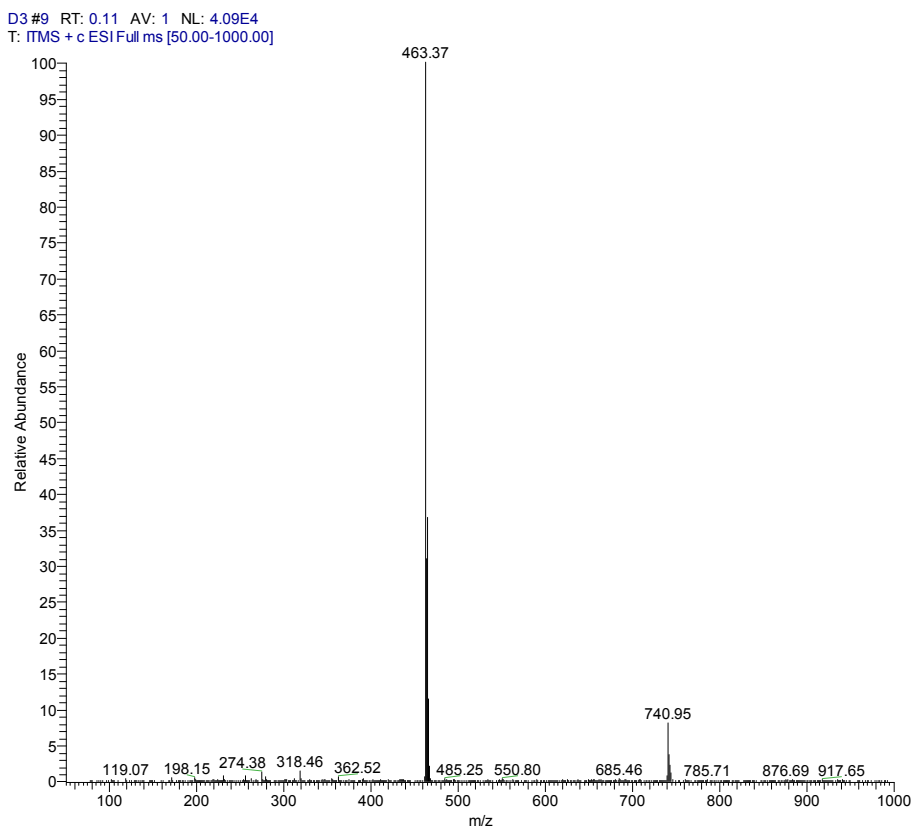

**Fig 22.** <sup>1</sup>H NMR spectrum of 4-(4-Chloro-phenyl)-2-ethoxy-12-methyl-5,6-dihydrobenzo[*j*][1,7]phenanthroline (**5d**):

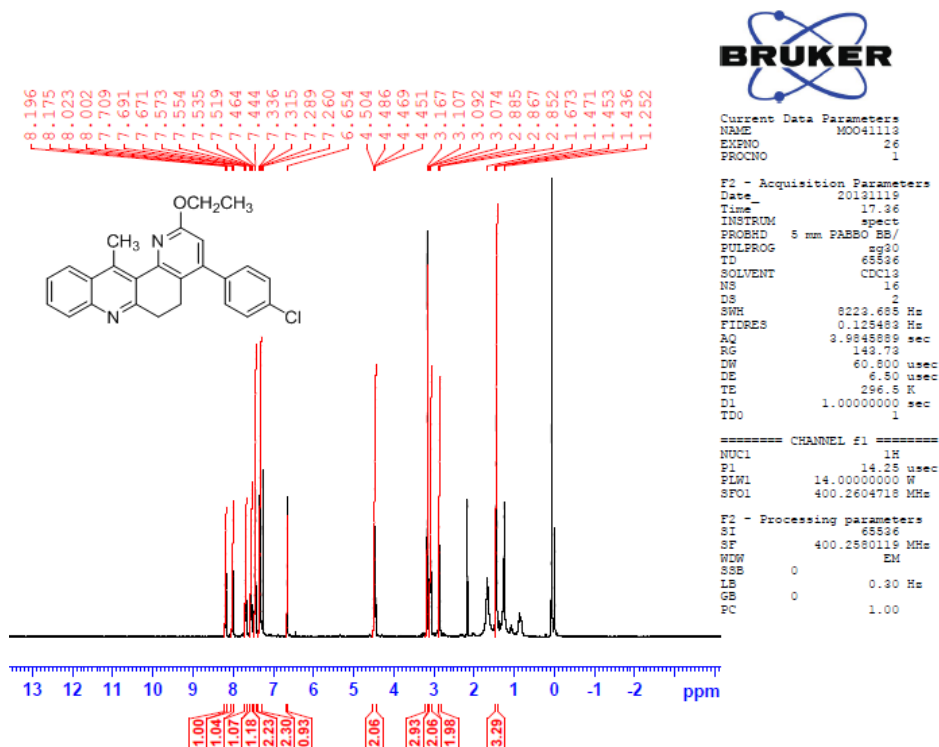

**Fig 23.**  $^{13}\text{C}$  NMR spectrum of 4-(4-Chloro-phenyl)-2-ethoxy-12-methyl-5,6-dihydrobenzo[*j*][1,7]phenanthroline (**5d**):

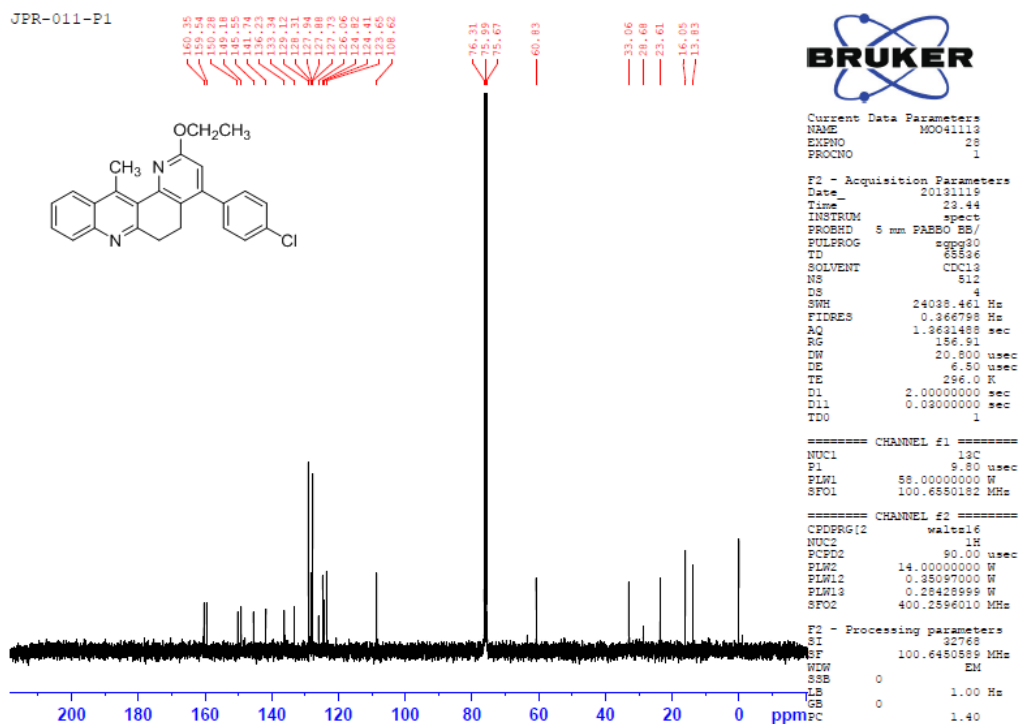

**Fig 24.** ESI-MS spectrum of 4-(4-Chloro-phenyl)-2-ethoxy-12-methyl-5,6-dihydrobenzo[*j*][1,7]phenanthroline (**5d**):

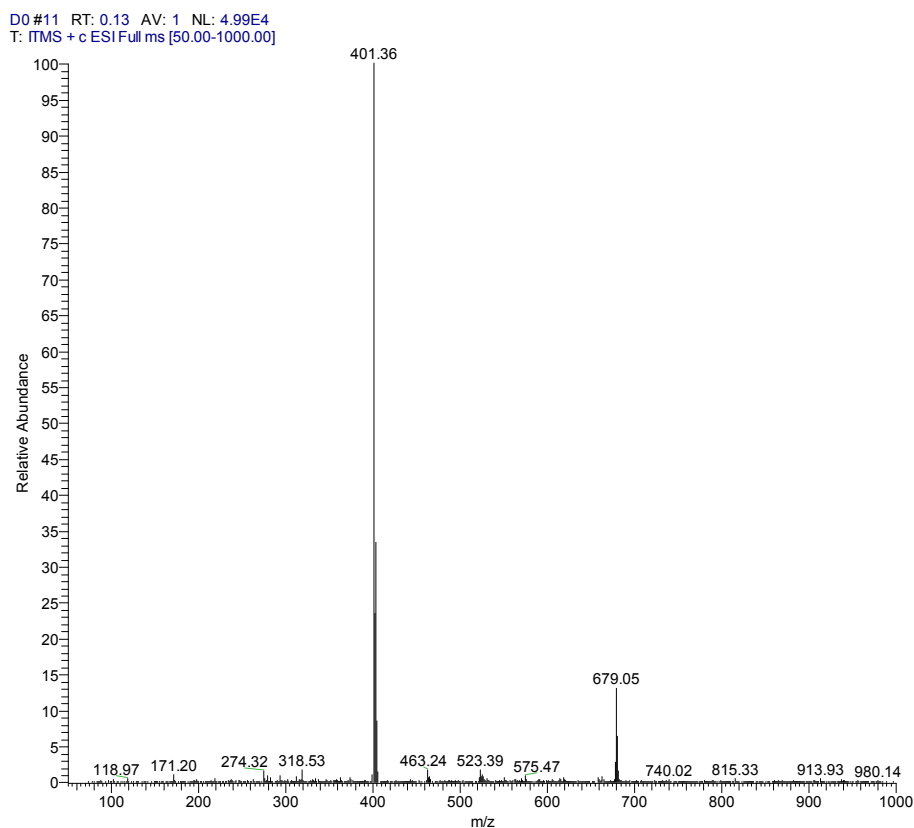

**Fig 25.**  $^1\text{H}$  NMR spectrum of 10-chloro-4-(2-chlorophenyl)-2-ethoxy-12-phenyl-5,6-dihydrobenzo[*j*][1,7]phenanthroline (**5e**)

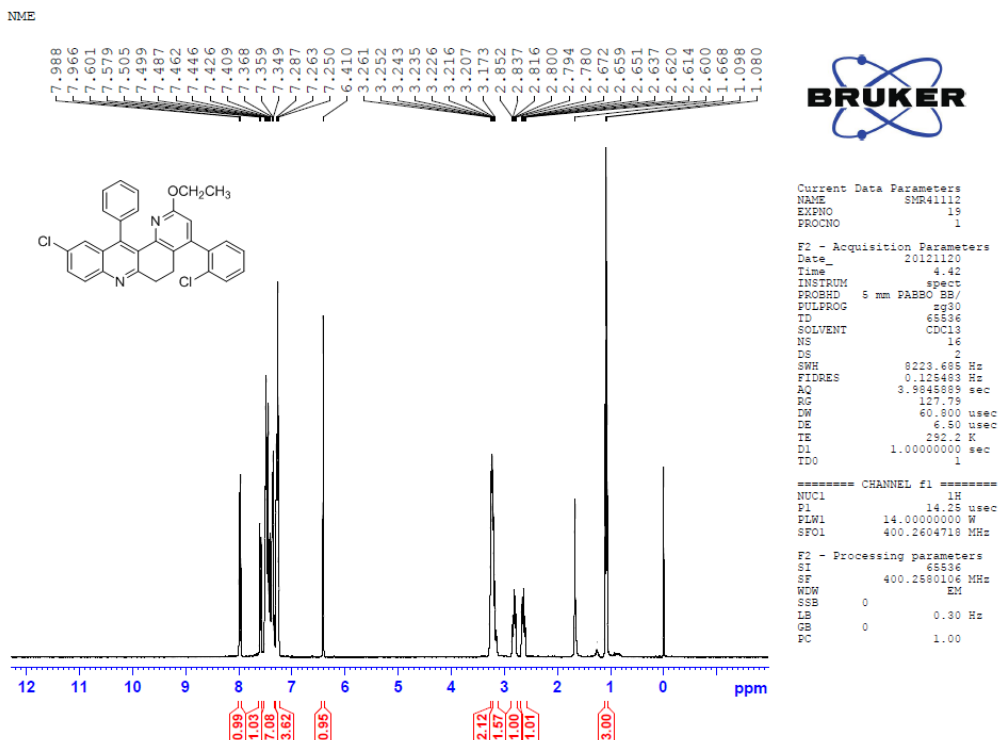

**Fig 26.**  $^{13}\text{C}$  NMR spectrum of 10-chloro-4-(2-chlorophenyl)-2-ethoxy-12-phenyl-5,6-dihydrobenzo[*j*][1,7]phenanthroline (**5e**)

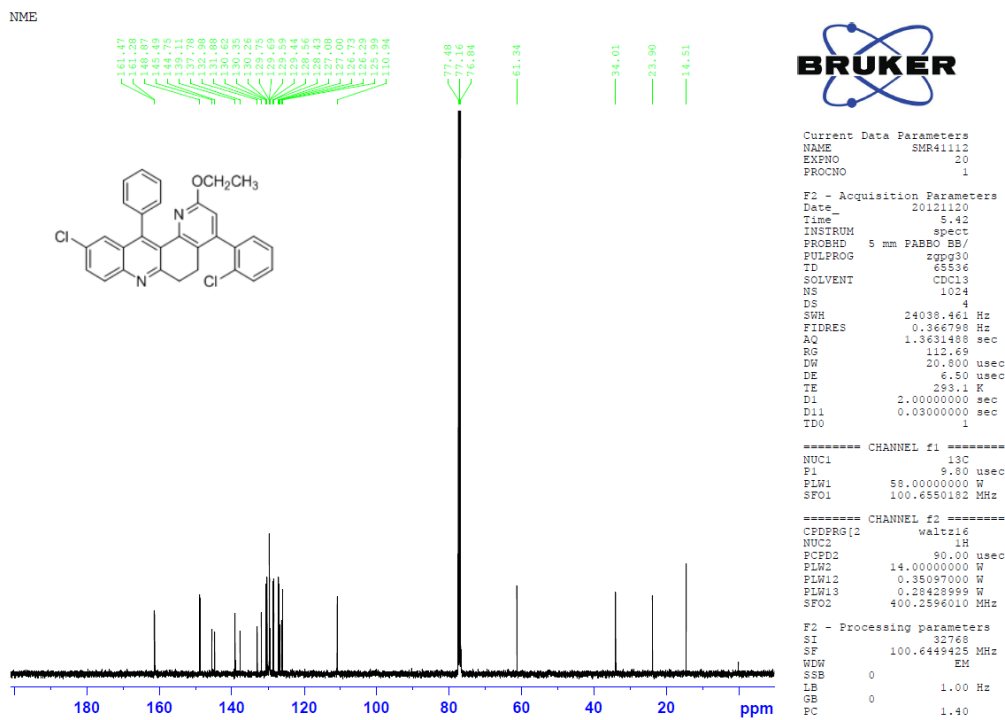

**Fig 27.** ESI-MS spectrum of 10-chloro-4-(2-chlorophenyl)-2-ethoxy-12-phenyl-5,6-dihydrobenzo[*j*][1,7]phenanthroline (**5e**)

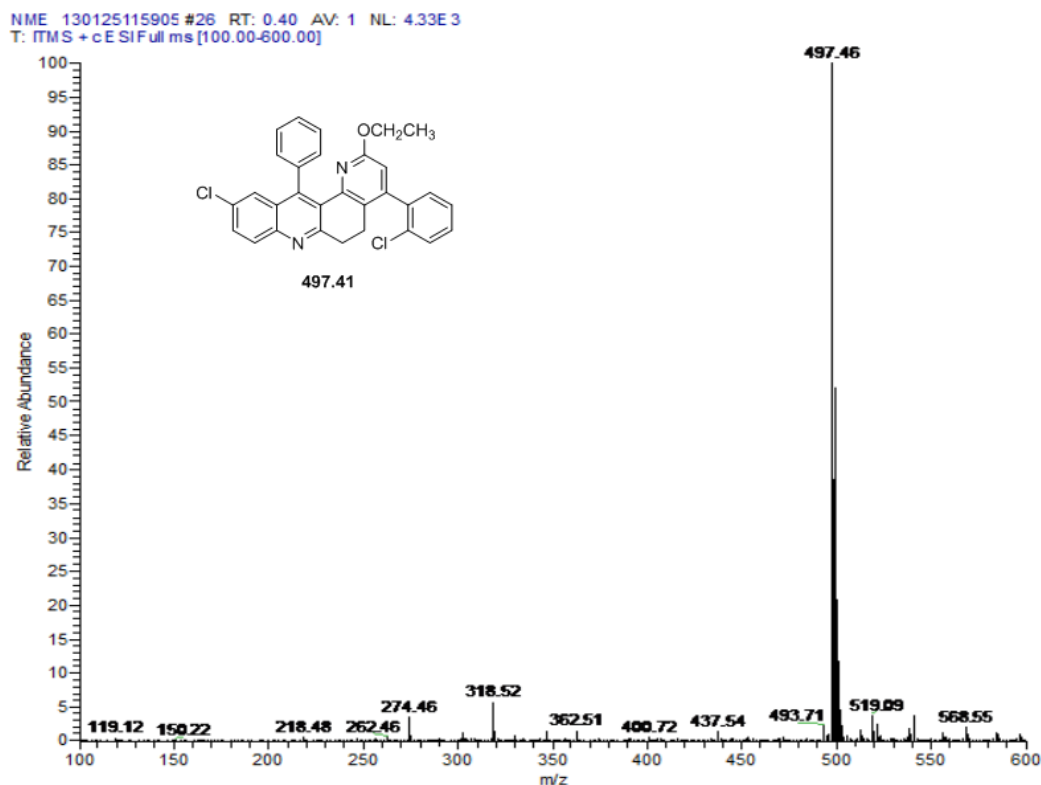

**Fig 28.** <sup>1</sup>H NMR spectrum of 10-chloro-4-(2,5-dimethoxyphenyl)-2-ethoxy-12-phenyl-5,6-dihydrobenzo[*j*][1,7]phenanthroline (**5f**)

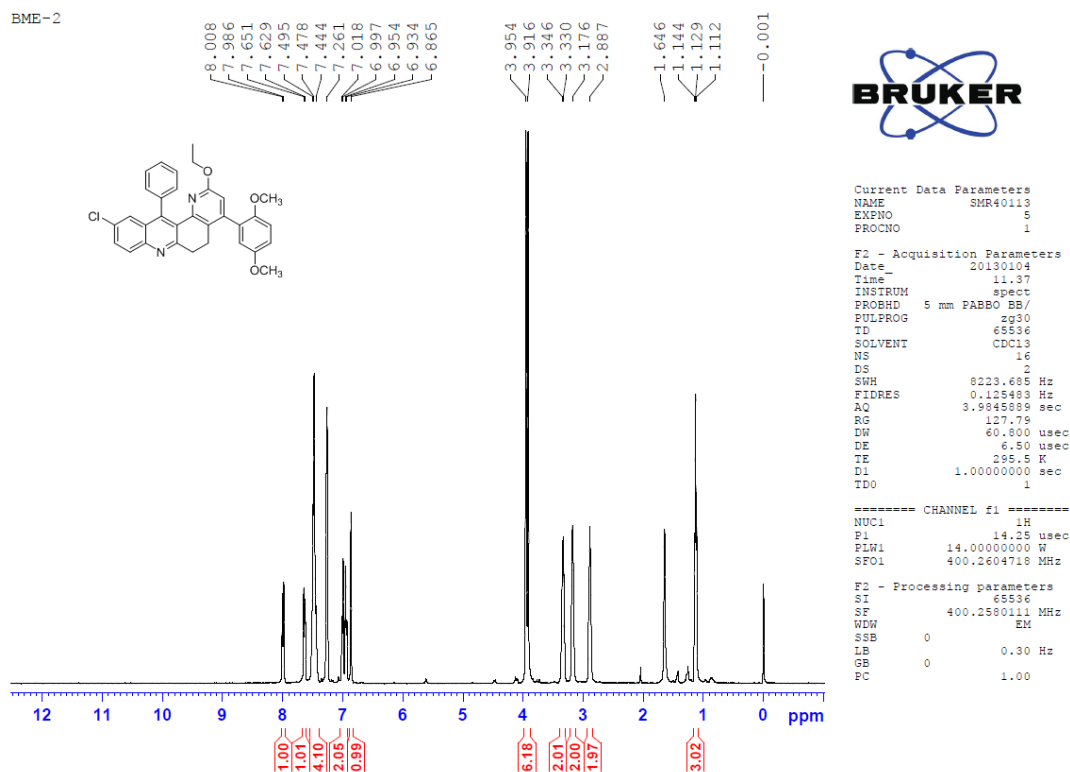

**Fig 29.**  $^{13}\text{C}$  NMR spectrum of 10-chloro-4-(2,5-dimethoxyphenyl)-2-ethoxy-12-phenyl-5,6-dihydrobenzo[*j*][1,7]phenanthroline (**5f**)

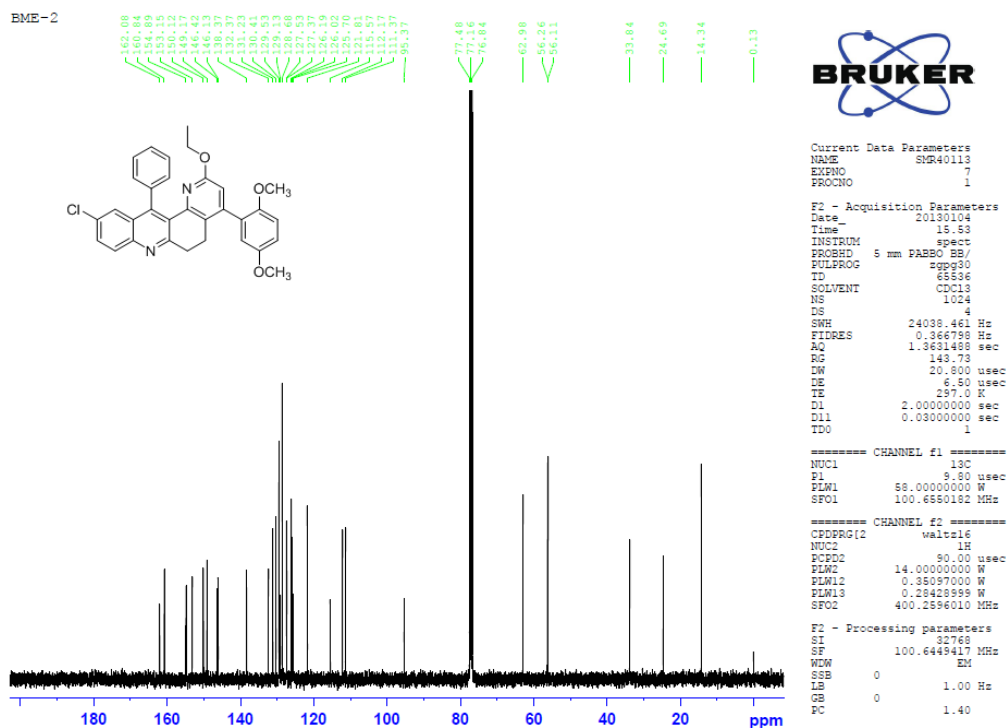

**Fig 30.** ESI-MS spectrum of 10-chloro-4-(2,5-dimethoxyphenyl)-2-ethoxy-12-phenyl-5,6-dihydrobenzo[*j*][1,7]phenanthroline (**5f**)

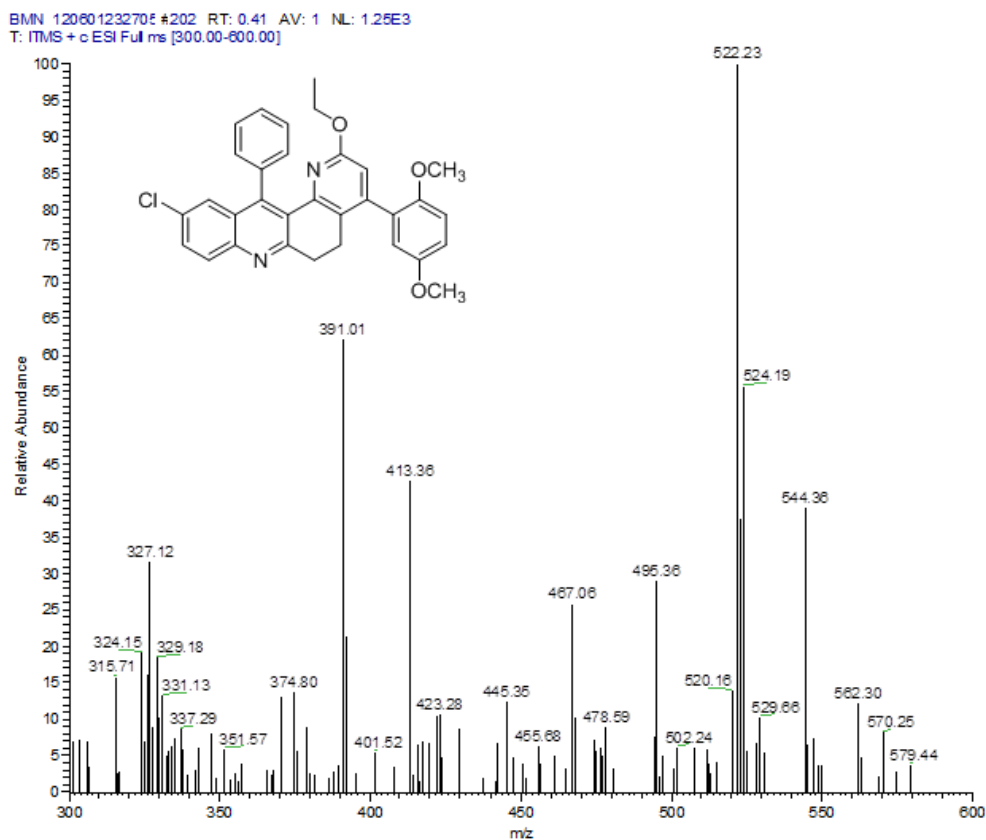



**Fig 31.**  $^1\text{H}$  NMR spectrum of 10-chloro-2-ethoxy-4-(3-methoxyphenyl)-12-phenyl-5,6-dihydrobenzo[*j*][1,7]phenanthroline (**5g**)

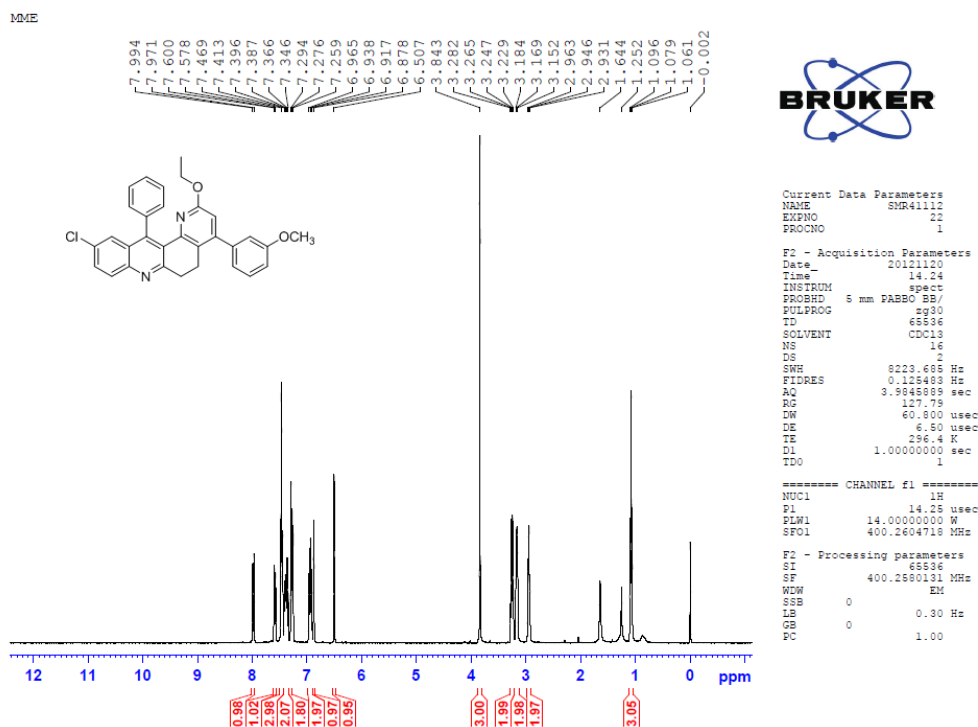

**Fig 32.**  $^{13}\text{C}$  NMR spectrum of 10-chloro-2-ethoxy-4-(3-methoxyphenyl)-12-phenyl-5,6-dihydrobenzo[*j*][1,7]phenanthroline (**5g**)

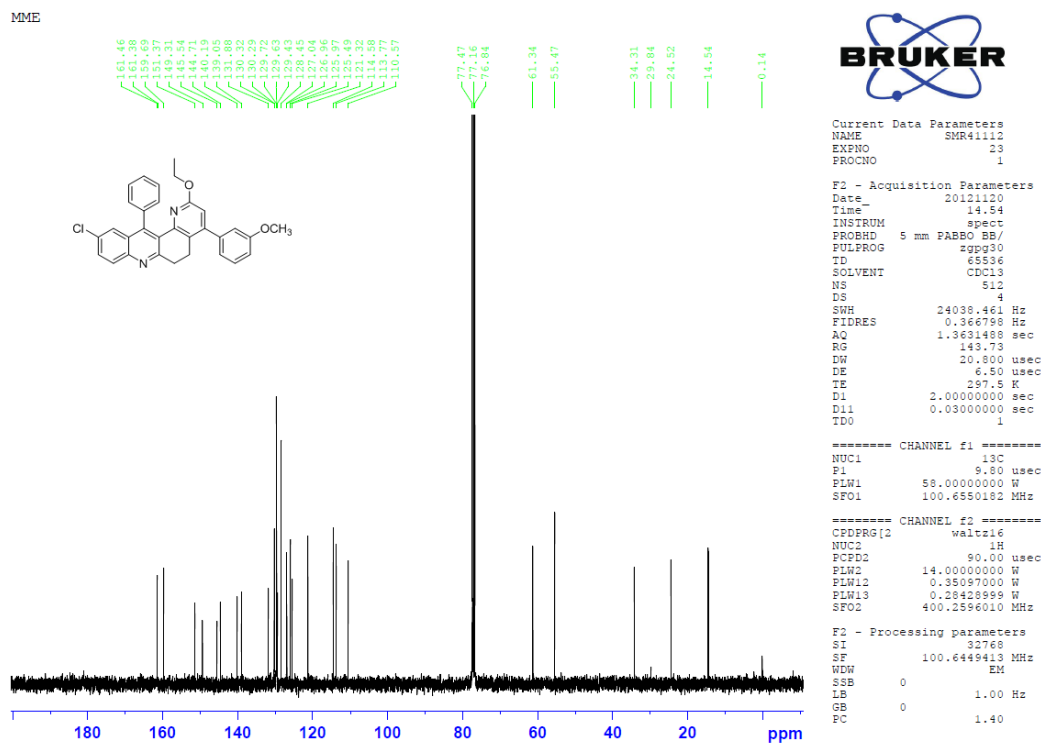

**Fig 33.** ESI-MS spectrum of 10-chloro-2-ethoxy-4-(3-methoxyphenyl)-12-phenyl-5,6-dihydrobenzo[*j*][1,7]phenanthroline (**5g**)

MME\_130125115905 #34 RT: 0.53 AV: 1 NL: 4.00E3  
T: TMS + cESI Full ms [100.00-600.00]

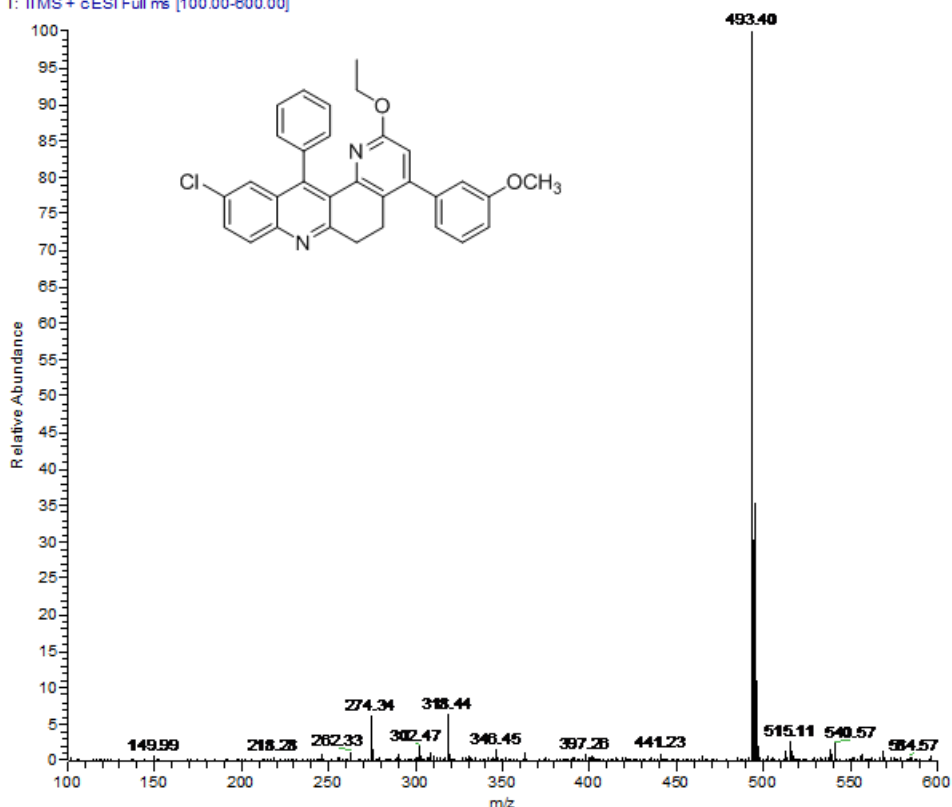

**Fig 34.** <sup>1</sup>H NMR spectrum of 10-chloro-2-ethoxy-4,12-diphenyl-5,6-dihydrobenzo[*j*][1,7]phenanthroline (**5h**)

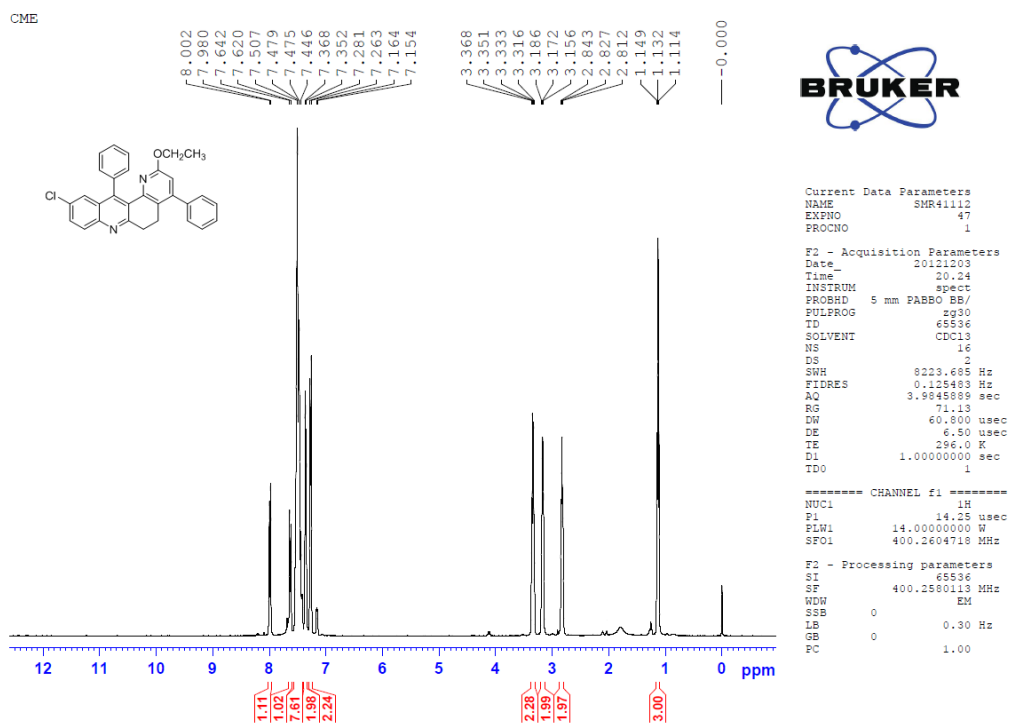

**Fig 35.**  $^{13}\text{C}$  NMR spectrum of 10-chloro-2-ethoxy-4,12-diphenyl-5,6-dihydrobenzo[*j*] [1,7] phenanthroline (**5h**)

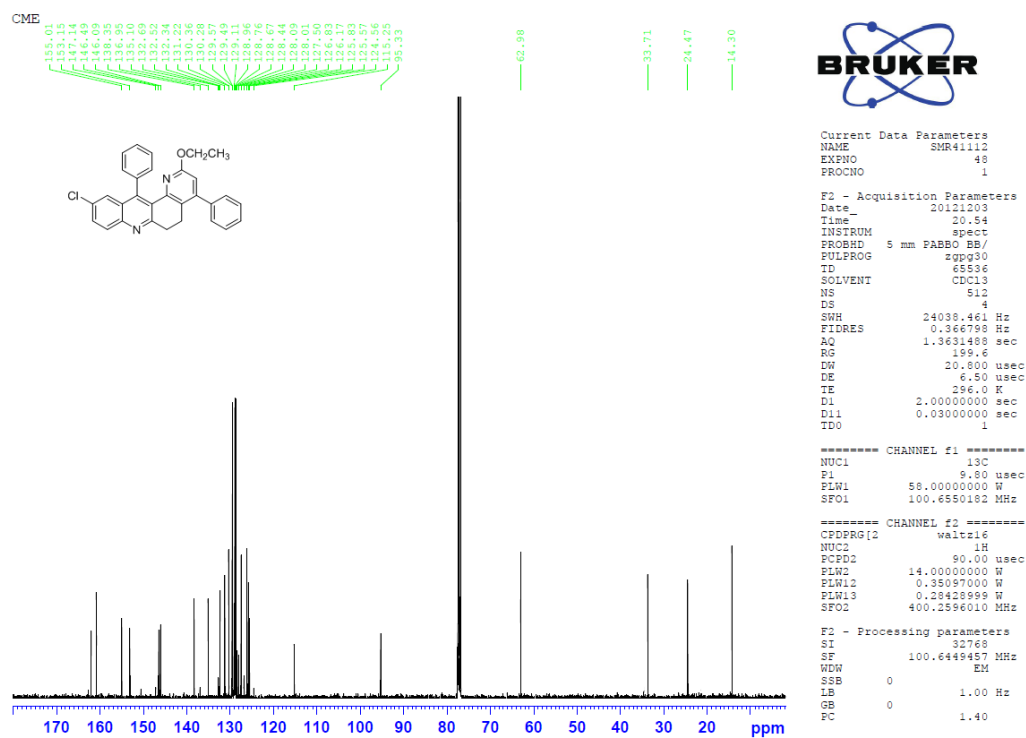

**Fig 36.** ESI-MS spectrum of 10-chloro-2-ethoxy-4,12-diphenyl-5,6-dihydrobenzo[*j*][1,7] phenanthroline (**5h**)

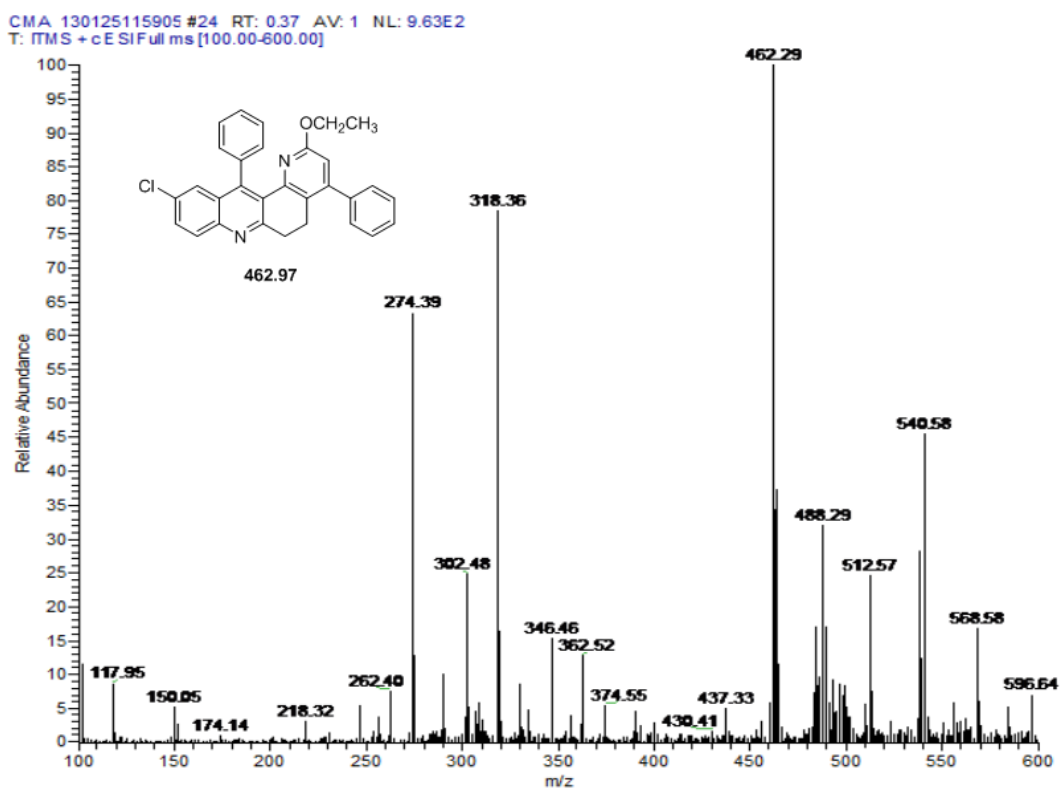

**Fig 37.**  $^1\text{H}$  NMR spectrum of 2-amino-10-chloro-4-(3,4-dimethoxyphenyl)-12-phenyl-5,6-dihydro-4*H*-pyrano[2,3-*a*]acridine-3-carbonitrile (**8a**)

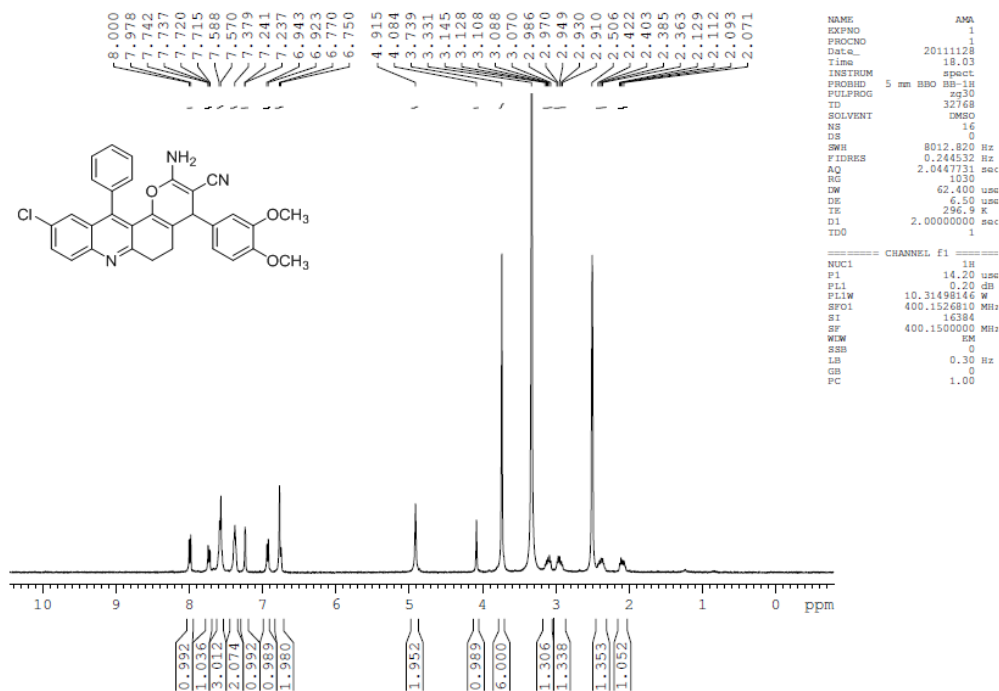

**Fig 38.**  $^{13}\text{C}$  NMR spectrum of 2-amino-10-chloro-4-(3,4-dimethoxyphenyl)-12-phenyl-5,6-dihydro-4*H*-pyrano[2,3-*a*]acridine-3-carbonitrile (**8a**)

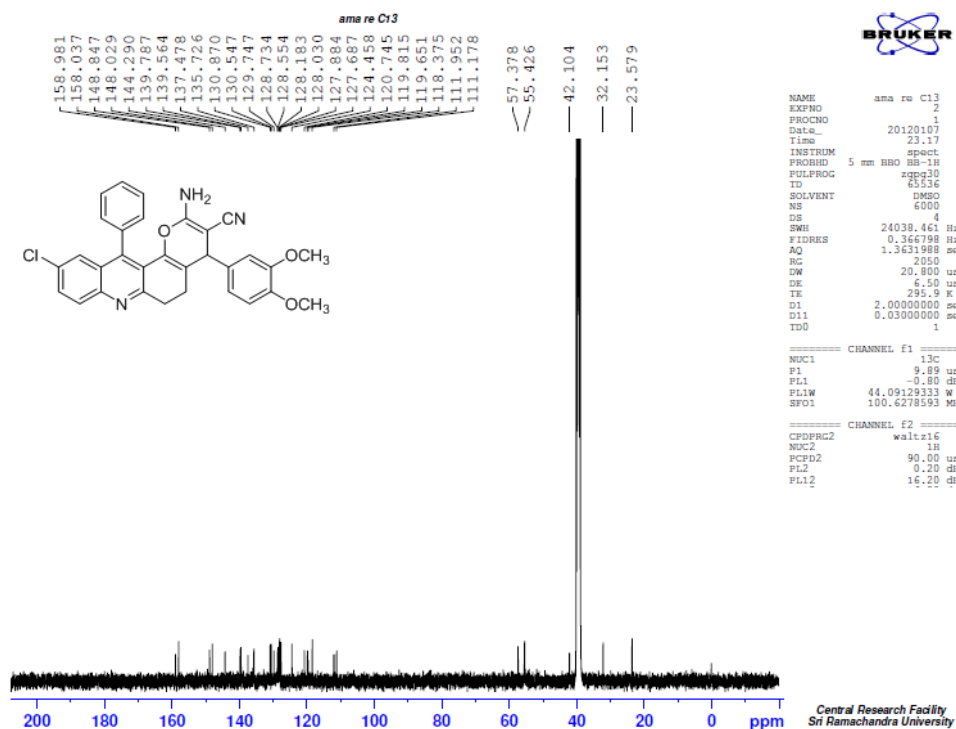

**Fig 39.** ESI-MS spectrum of 2-amino-10-chloro-4-(3,4-dimethoxyphenyl)-12-phenyl-5,6-dihydro-4*H*-pyrano[2,3-*a*]acridine-3-carbonitrile (**8a**)

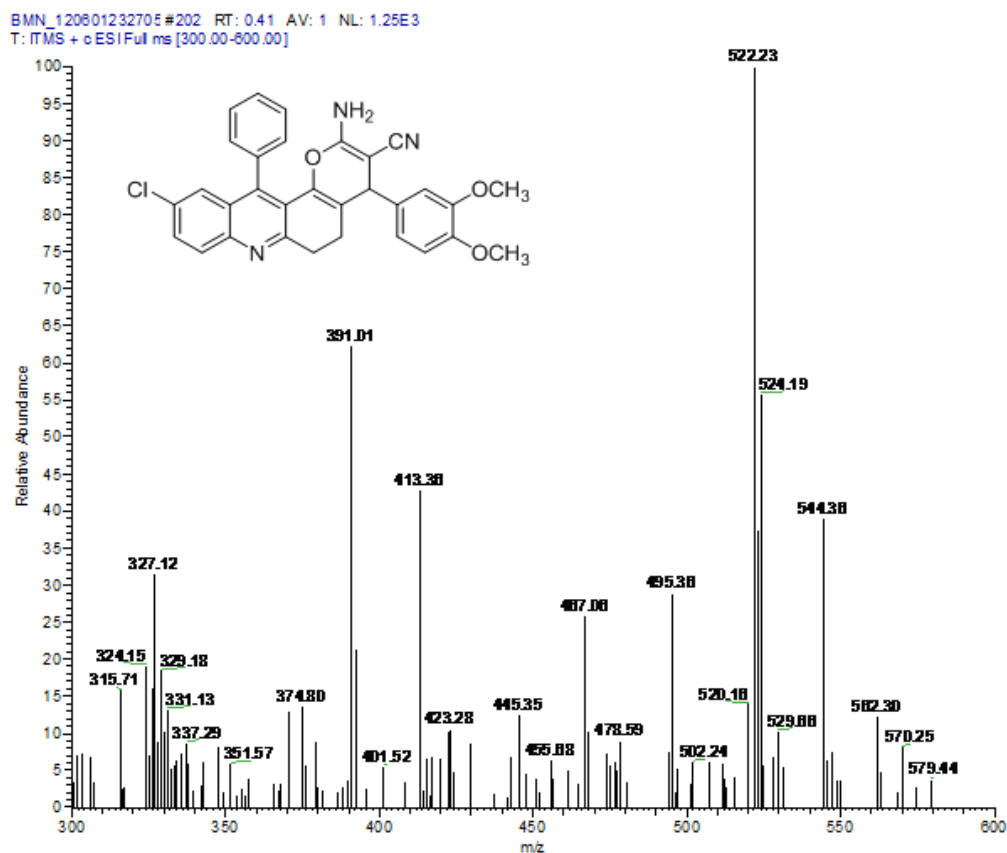

**Fig 40.** <sup>1</sup>H NMR spectrum of 2-amino-10-chloro-4-(4-chlorophenyl)-12-phenyl-5,6-dihydro-4*H*-pyrano[2,3-*a*]acridine-3-carbonitrile (**8b**)

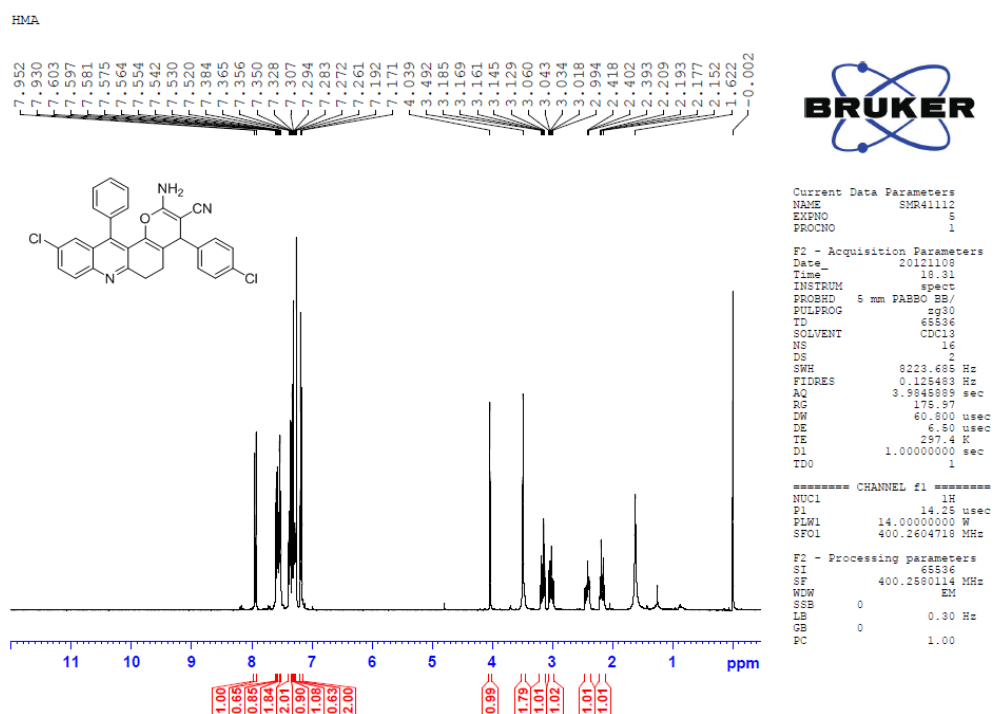

**Fig 41.**  $^{13}\text{C}$  NMR spectrum of 2-amino-10-chloro-4-(4-chlorophenyl)-12-phenyl-5,6-dihydro-4*H*-pyrano[2,3-*a*]acridine-3-carbonitrile (**8b**)

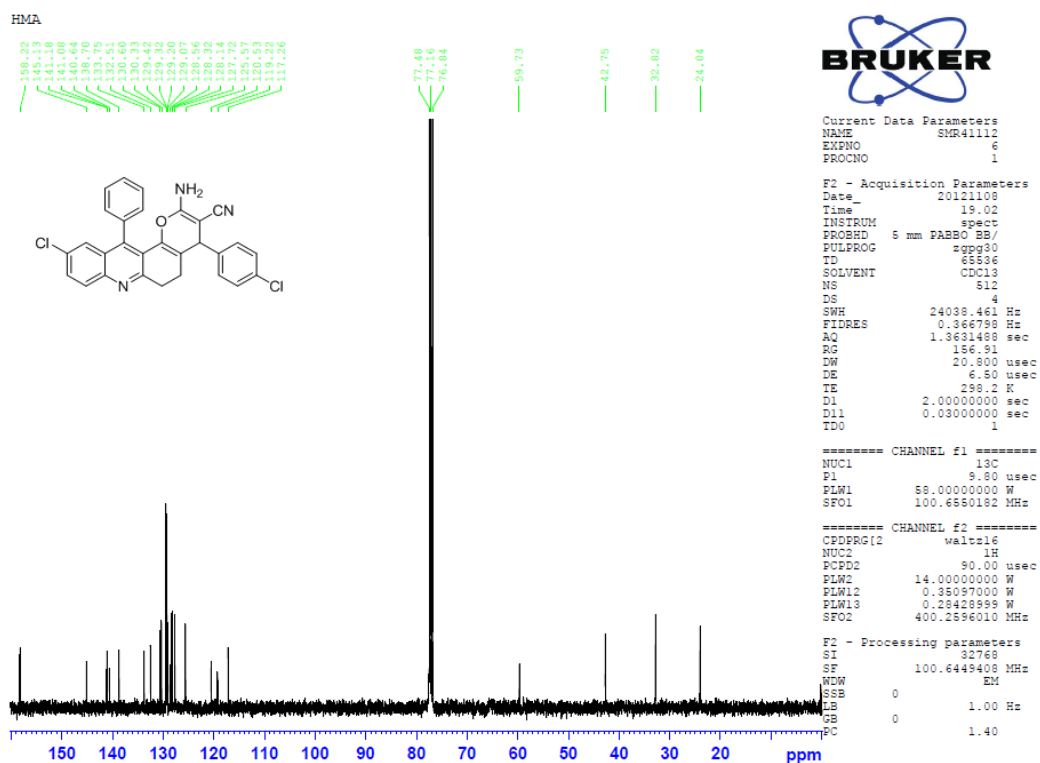

**Fig 42.** ESI-MS spectrum of 2-amino-10-chloro-4-(4-chlorophenyl)-12-phenyl-5,6-dihydro-4*H*-pyrano[2,3-*a*]acridine-3-carbonitrile (**8b**)

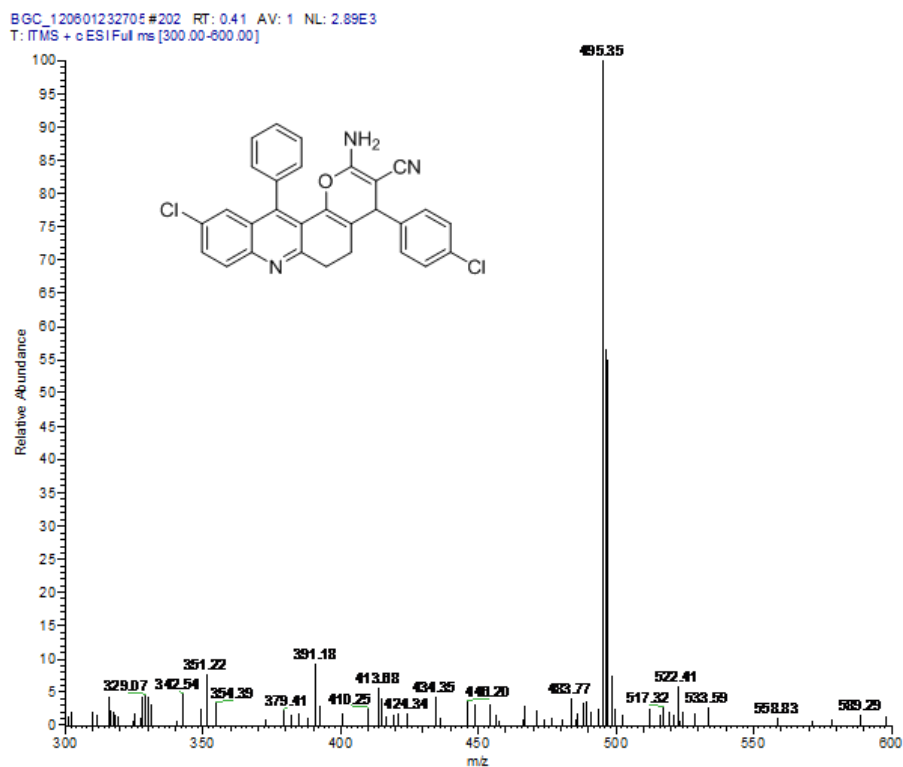

Supplement: c4ra16640j1.pdf [file c4ra16640j1.pdf]
